# Supplementary material for: Adverse pregnancy outcomes are associated with Plasmodium vivax malaria in a prospective cohort of women from the Brazilian Amazon
Source: PLoS Negl Trop Dis. 2021 Apr 29;15(4):e0009390. doi: 10.1371/journal.pntd.0009390 (PMC8112668; doi:10.1371/journal.pntd.0009390)
Supplement: S1 Data — (XLSX) [file pntd.0009390.s009.xlsx]

## Sheet: Dataset_Pv
id	group	number_infec	age	occupation	education	residence	gravidity	previous_mal	prev_mal_gest	weight_1	weight_2	hb_gest	ht_gest	hb_delivery	ht_delivery	weight_plac	abortion	stillbirth	gender_nb	lbw	adverse_effect	weight_nb	sga	length	length_reduced	ri	hc_nb	hc_reduced	chest_circumf	apg1	apg5	delivery	anv	GA_delivery	sna	fibrin	necrosis	CD68	CD45	vascularity	proliferation	barrier_thickness	plac_mal	hemozoin	ang1	ang2	tie2	vegfr1	vegfr2
523	0	0	14	Student	3	1	1	1	0	48	57.7	11.3	35.6	13	39.6	507	0	0	2	0		3250	0	49	0	2.76	33	0	33	9	10	1	3	39.1429	5	1.08333	1.16279	2	4	4.3	5	1.90883	0	0	7086.13	19833.4	6326.15	115468	13043.7
332	1	1	28	Other	4	1	2	1	0	60	65	12.2	37.75	13.2	41.3	520.9	0	0	1	0		3330	0	49	0	2.83	35	0	33	9	10	1	5	39.4286	30	2.91667	11.194	16	34	3.3	3.5	2.05342	0	0	13963	7294.36	17160.1	126160	17020.5
313	1	2	24	Housewife	3	1	2	1	1	53	61	11.15	33.7	10.7	33.1	530.2	0	0	2	0		3345	0	50	0	2.68	34	0	34	9	10	1	5	40.1429	32	2.75	6.09756	11	24	.	1.9	2.05441	0	0	20119.4	11624.8	19547.3	74437.6	15160.4
414	1	1	24	Other	4	1	2	1	1	63	69	11.25	30.85	12.1	35.1	655.8	0	0	1	0		3835	0	53	0	2.58	35	0	36	9	10	1	13	41.8571	22	2	12.7413	1	9	3.6	3.7	2.05754	0	0	4662.86	6130.94	4489.88	135984	12498.5
522	0	0	29	Other	4	1	2	1	0	47	62	14.45	43.4	.	.	517.2	0	0	1	0		2775	0	49	0	2.36	32	0	31	9	10	1	6	37.8571	8	1.25	2.04082	2	22	3.4	2.4	2.12384	0	0	26930.7	17915.9	15140.2	162856	12081.6
544	1	2	14	Student	3	2	1	1	0	50	59.9	12.2	37.6	11.3	35.6	593.73	0	0	1	0		2800	0	47	0	2.7	32	0	32	8	10	1	8	36.7143	9	1.91667	10.0559	40	34	2.6	2.2	2.17806	0	0	21167.3	5829.32	30748.5	85706.7	19489.9
467	1	3	17	Student	4	1	1	1	0	45	51.5	10.5	29.4	11.5	33.7	533.9	0	0	2	0		2720	0	48	0	2.46	33	0	33	9	10	1	6	38.1429	51	2.91667	7.8853	17	32	4	4.5	2.20221	0	0	13111.6	3114.68	32952	0	13941.7
379	0	0	19	Housewife	4	1	1	0	0	49	62	11	33.65	11.5	34	665.45	0	0	2	0		3240	0	47	1	3.12	32	1	33	6	9	1	7	40.4286	34	2.91667	12.5436	4	10	3	1.8	2.22562	0	0	12849.6	17312.6	7611.53	127315	13364.4
162	0	0	38	Housewife	3	2	2	1	1	61	71	11.2	31.1	.	.	695.05	0	0	2	0		3675	0	48	0	3.32	35	0	35	9	9	2	8	38.1429	6	1.91667	10.8434	1	5	4.3	3.5	2.2326	0	0	14683.4	18605.3	8713.29	124426	11504.3
421	1	2	42	Other	4	2	2	1	1	64	73	11	34.8	.	.	705.09	0	0	2	0		3910	0	50	0	3.13	36	0	37	9	10	2	6	40.4286	12	1.91667	4.86891	4	9	5.2	2.3	2.26686	0	0	10819.3	5139.88	14405.7	68947.6	17694
42	0	0	28	Other	4	1	2	0	0	54	69	12.2	.	12.6	38.7	673.4	0	0	1	0		3220	0	51	0	2.43	36	0	34	8	9	2	5	38.1429	7	2	5.83333	4	18	2.7	3.6	2.2684	0	0	21560.3	7208.18	10182.3	109689	13941.7
377	0	0	19	Housewife	3	1	2	1	0	80	90	13.55	39	12.3	36.1	633.7	0	0	2	0		3630	0	49	0	3.09	34	0	35	9	10	1	10	40	15	2	2.92887	1	2	3.7	4.5	2.27128	0	0	10753.8	3524.03	14589.3	90040.9	17790.2
324	0	0	33	Farmer	2	1	2	1	0	49	65.8	.	.	12.9	40.1	549.8	0	0	2	0		3395	0	51	0	2.56	34	0	35	9	10	1	8	39	12	1.91667	13.3641	3	.	.	.	2.27238	0	0	31908.3	10698.4	19914.5	77038.2	15609.4
235	0	0	21	Student	4	1	1	1	0	43	61.5	11.1333	33.3667	10.9	33	672.1	0	0	2	0		3840	0	50	0	3.07	33	0	35	9	10	1	11	39.8571	18	2.91667	4.54545	1	15	5.5	2.3	2.29889	0	0	42125.3	960.211	21567.1	9712.94	14711.4
244	0	0	26	Other	4	1	1	0	0	54	67	10.8	32.4	.	.	640.09	0	0	2	0		3500	0	50	0	2.8	33	0	32	9	10	1	.	39.1429	14	1	5.20446	4	13	4.3	4.5	2.30087	0	0	6496.68	0	30014	1044.45	16860.1
38	1	2	30	Housewife	2	1	2	1	0	87	93	10.8	33.2	12.5	37.6	429.2	0	0	2	0		3120	0	50	0	2.5	35	0	33	9	10	2	5	39.4286	20	1	2.72727	7	22	6	7.2	2.36471	0	0	29223	141.512	25056.1	3356.05	17084.6
320	1	3	16	Student	4	1	1	1	0	45	53	12.8	40.4	.	.	510.25	0	0	2	0		2675	0	48	0	2.42	32	0	33	9	10	1	6	36	7	2.83333	3.87931	11	21	4.3	2.6	2.37984	0	0	25686.4	701.675	37909.9	21848.8	12658.9
281	1	1	24	Housewife	4	1	2	1	0	53	61	9.95	30.15	10.1	32.1	570.95	0	0	2	0		2870	0	48	0	2.6	34	0	33	9	10	1	8	37.7143	11	2.83333	10.8225	6	30	.	1.6	2.39333	0	0	15272.8	15265.9	8346.04	142052	13973.8
303	0	0	25	Farmer	4	1	1	0	0	63	69	12	35.5	12.4	37.1	468.45	0	0	2	1		2480	1	47	0	2.39	33	0	33	9	9	2	9	37.7143	7	1.91667	6.75105	5	18	2.9	4	2.39843	0	0	7806.56	8177.69	29463.1	38896.8	18239.2
84	0	0	17	Housewife	4	1	1	0	0	54	68	12.3	35.6	.	.	529.74	0	0	2	0		3065	0	49	0	2.61	33	0	34	9	9	2	10	40.4286	18	3.08333	12.1528	1	9	3.7	5.2	2.3985	0	0	15927.8	1412.65	14038.5	1333.4	11889.2
265	1	1	30	Housewife	1	1	2	1	1	73	86	13.6	38.6	10.1	30.9	567.1	0	0	2	0		3660	0	50	0	2.93	33	0	35	9	10	1	7	40.7143	14	2.91667	19.3878	16	28	5	2.5	2.42443	0	0	18940.5	12077.3	5958.89	155055	16058.4
32	0	0	16	Housewife	3	1	1	0	0	59	67	.	.	.	.	488.78	0	0	2	0		2890	0	46	1	2.97	31	1	32	9	10	1	5	38.8571	13	2.91667	3.54331	15	56	4.1	4	2.42976	0	0	.	.	.	.	.
391	1	2	21	Housewife	4	2	1	1	0	55	78	11.4	34.7	.	.	487.01	0	0	2	0		3065	0	49	0	2.61	34	0	34	8	9	2	8	40.7143	19	2.83333	8.66142	7	10	2.5	2.2	2.43727	0	0	8592.48	2813.05	11100.4	123559	13268.2
406	1	3	26	Other	4	1	2	1	1	67	88	12.15	37.9	13.2	41.2	657.54	0	0	1	0		3615	0	50	0	2.89	35	0	35	8	10	1	10	41.1429	10	2.83333	16.2996	7	15	3.6	4.7	2.44103	0	0	20774.3	0	12753.1	134539	14839.7
337	1	1	23	Farmer	2	2	2	1	1	66	77	12.55	35.75	.	.	467.48	0	0	2	0		2835	0	48	0	2.56	36	0	33	8	9	2	6	38.5714	19	2.83333	3.52423	6	13	4.7	4.3	2.45368	0	0	7675.57	3976.47	26525.1	0	14871.8
465	0	0	16	Student	4	1	1	0	0	54	63	11.7	35.5	10.6	33	274.18	0	0	2	1		1075	1	36	1	2.3	26.5	1	22	9	9	2	5	33.2857	12	2.83333	6.90909	1	7	4.1	3.3	2.46704	0	0	14159.5	8091.5	3939	383325	10991.2
352	1	2	25	Other	3	1	1	1	0	66	77	12	.	12.4	38.6	420.61	0	0	2	0		3050	0	49	0	2.59	33	0	34	8	9	2	4	38	23	2	7.5	5	21	5	1.7	2.47	0	0	11998.2	21018.3	13487.6	144074	13236.2
198	1	1	17	Student	4	1	1	0	0	87	92	9.85	30.2	8.7	27.6	576.86	0	0	1	0		2760	0	49	0	2.35	32	0	32	9	10	1	8	38.4286	7	3.75	2.29885	15	40	4	3.3	2.4733	0	0	34331.5	1649.64	24688.8	0	14519
246	0	0	27	Housewife	4	1	2	1	0	66	81.7	12	36	.	.	533.15	0	0	2	0		3975	0	51	0	3	34	0	35	9	10	1	11	40.2857	17	1.83333	14.9321	4	29	3.4	4.3	2.4786	0	0	12980.6	8996.39	3571.75	104777	12338.2
563	1	1	28	Housewife	3	1	2	1	1	59	64	11.05	35.85	12	36.3	528.03	0	0	2	0		3410	0	51	0	2.57	34	0	34	9	10	1	9	39.7143	19	1.91667	11.1969	6	15	4.9	1.7	2.49097	0	0	10033.3	7574.43	14956.6	81950.3	15769.7
34	0	0	24	Housewife	4	1	2	1	0	59	74	12.3	37.6667	13	38.7	622.98	0	0	1	0		3015	0	49	0	2.56	35	0	33	9	10	2	10	38	14	2	10.2703	8	20	3.7	5.7	2.5015	0	0	13897.5	8953.3	21016.3	68947.6	14198.3
516	0	0	19	Student	4	1	1	0	0	65	80.5	11.9	35	12.3	37	532.27	0	0	1	0		3240	0	48	0	2.93	36	0	34	8	9	2	5	39.8571	16	1.91667	12.6168	4	15	3.8	1.8	2.53289	0	0	8068.53	15933.8	5775.26	106800	15449
493	0	0	30	Other	4	1	2	0	0	102	122	12.75	38.7	10.2	31.2	656.6	0	0	1	0		3370	0	50	0	2.7	35	0	34	9	10	2	7	40.7143	10	1.91667	4.12371	3	5	3.3	2.1	2.54104	0	0	17499.6	9901.26	7978.78	109401	10381.9
245	0	0	19	Housewife	3	1	1	1	0	67	72	10.5	32.1	9.6	30.4	762.34	0	0	2	0		4075	0	50	0	3.26	34	0	34	8	10	1	7	40.2857	13	1.08333	2.73973	0	17	3.6	3.2	2.54442	0	0	5841.74	26512.2	3020.87	100732	12113.7
254	1	1	31	Other	4	1	2	1	0	49	62	11.3333	33.3667	12.3	36.9	403.63	0	0	1	0		2795	1	49	0	2.38	32	1	32	8	9	2	12	39.5714	8	1.08333	5.88235	10	29	5.3	4	2.54585	0	0	10884.8	4385.82	9080.54	145519	14005.9
492	0	0	18	Housewife	4	1	2	0	0	61	76.5	.	.	9.5	30.3	764.14	0	0	1	0		3345	0	48	0	3.02	33	0	34	9	10	1	3	38.7143	11	2.08333	12.987	8	21	5.6	2.9	2.558	0	0	18482	2705.33	21934.4	145230	13268.2
98	1	1	22	Housewife	3	2	2	1	0	55	65	10.6667	32.8333	10.3	31.7	745.3	0	0	1	0		3800	0	55	0	2.28	37	0	37	9	10	1	8	40.8571	27	2.75	4.329	9	23	3.3	3.8	2.56066	0	0	15534.8	1994.36	18629.1	9712.94	15737.7
468	0	0	19	Student	4	1	1	1	0	69	74	12	35.9	.	.	437.75	0	0	2	0		2645	1	48	0	2.39	32	1	31	9	10	1	5	39.8571	15	1.91667	5.59701	11	23	3.2	4.2	2.56076	0	0	33742.1	2274.44	22852.5	7979.24	15545.2
292	0	0	27	Other	4	1	1	0	0	44	54.5	11.75	34.65	.	.	534.5	0	0	1	0		3055	0	.	.	.	35	0	36	9	10	2	11	38.4286	13	1.91667	1.50943	8	24	4.2	3.8	2.57634	0	0	15010.9	6324.84	8896.92	126449	13588.9
515	0	0	31	Other	4	1	2	1	0	47	57.6	9.5	30.1	9.2	29.3	506.76	0	0	2	0		2510	1	46	1	2.58	34	0	32	8	9	2	4	39.8571	17	1.08333	11.3744	4	7	4.1	3.7	2.58127	0	0	9050.94	5570.77	5408.01	101888	12049.5
365	0	0	26	Housewife	4	1	2	1	0	53	66	12.5	37.2	.	.	651.8	0	0	2	0		3540	0	50	0	2.83	34	0	35	9	10	1	8	40.4286	10	1.91667	13.2	1	6	2.9	4.8	2.58285	0	0	8919.95	2188.26	16425.6	0	15288.7
118	0	0	15	Housewife	3	1	1	1	0	56	73	12.6	39.5	.	.	551.93	0	0	2	0		3120	0	50	0	2.5	33	0	32	9	10	1	8	39.4286	17	1.91667	3.3195	2	28	5.8	2	2.58689	0	0	23721.5	17463.5	6509.77	207065	14615.2
400	0	0	26	Other	4	1	2	0	0	52	71	10.9	34.2	9.9	31.2	521.6	0	0	2	0		3100	0	49	0	2.63	35	0	34	9	10	1	10	40.7143	13	1.91667	1.63265	4	20	4.4	2.2	2.59336	0	0	8068.53	13671.6	16609.2	78482.9	12145.7
273	1	1	21	Housewife	4	2	2	1	1	51	58.5	12.7	37	12.9	37.3	537.6	0	0	2	0		3139	0	50	0	2.51	33	0	32	9	10	1	6	39.4286	11	2.75	11.7409	6	20	5.3	4.2	2.60232	0	0	15862.3	2877.69	9998.68	62590.7	13621
556	1	2	17	Housewife	3	2	1	1	0	48	.	.	.	11.6	36.2	439.3	0	0	1	0		2905	0	48	0	2.63	33	0	31	9	10	1	6	39.2857	10	2.83333	10.3825	21	38	4.5	3.7	2.62447	0	0	25555.4	3717.93	30932.1	53633.3	15513.2
79	1	3	18	Student	3	1	2	1	0	45	56.5	11.8	35.7	.	.	542.16	0	0	1	0		3485	0	49	0	2.96	36	0	35	8	9	2	6	39.8571	8	1.91667	8.83534	30	39	4.3	9.4	2.62473	0	0	17172.2	4773.62	15323.8	96397.8	16411.2
471	0	0	15	Student	4	1	1	0	0	41	60	13.7	41.3	13.4	39.3	559.15	0	0	2	0		3390	0	48	0	3.07	35	0	34	9	10	1	6	40.7143	9	1.91667	6.83453	1	17	3.4	2.5	2.628	0	0	8854.46	12917.5	8346.04	129627	17341.2
502	0	0	27	Other	4	1	1	1	0	49	62.7	11.45	.	12.6	37.4	545.61	0	0	2	0		3210	0	49	0	2.73	33	0	34	9	10	1	7	40.2857	16	1.91667	3.48837	1	24	4	3.8	2.63218	0	0	30532.9	3114.68	20465.4	7112.39	15801.8
229	1	1	23	Housewife	4	1	2	0	0	55	65	12.7	36	11.8	36.2	608.25	0	0	1	0		3610	0	49	0	3.07	34	0	33	9	10	1	5	38.1429	4	3.75	6.47249	6	27	3.4	4.4	2.64353	0	0	26341.3	0	24321.5	0	14390.7
500	0	0	23	Other	4	1	1	0	0	86	95	12.3	37.8	10.5	31.5	548.4	0	0	2	0		3080	0	48	0	2.79	34	0	34	9	9	2	9	39.2857	12	1.83333	5.67376	1	7	3.8	3.3	2.6523	0	0	19333.5	11948	7795.16	123559	16443.2
527	0	0	19	Student	4	1	1	1	0	47	60	10.65	32.4	11.5	35.2	594.2	0	0	1	0		3260	0	49	0	2.77	35	0	34	9	10	1	9	39.7143	6	2	6.01852	2	33	3.6	2.3	2.65238	0	0	23983.5	3480.94	35706.4	35429.4	16667.7
484	0	0	22	Housewife	4	1	1	1	0	45	62	11.8	33	10.4	33.3	673.5	0	0	1	0		3580	0	49	0	3.04	35	0	34	8	9	2	9	40.4286	17	2	5.69395	3	34	3.5	4	2.65444	0	0	12784.1	10289.1	11284.1	129049	10702.6
331	1	2	16	Student	4	1	1	1	0	52	70	12	36.3	12	35.2	519.93	0	0	1	0		2990	0	47	1	2.88	35	0	36	9	10	1	7	38.8571	12	3	5.99251	15	29	3.7	5	2.67332	0	0	26603.3	7100.45	26708.7	10579.8	17661.9
519	0	0	23	Student	4	1	1	0	0	62	80.9	12.05	36.55	11.6	35.4	459.7	0	0	1	0		3080	0	48	1	2.79	34	0	32	8	9	2	11	41.1429	14	1.91667	7.86517	2	21	4.5	3.7	2.6804	0	0	10950.3	6561.84	6326.15	131650	13172
304	1	2	19	Housewife	3	2	1	1	0	56	75	11.4	37.5	12.7	40.3	358.57	0	0	2	1	1	2370	1	47	0	2.28	32	1	32	9	10	1	6	38.7143	10	2.91667	.	39	.	3.4	7	2.7007	0	0	25686.4	12594.3	0	161989	16731.9
436	0	0	23	Student	4	2	1	1	0	48	65	12.3	38.8	10.8	32.7	766.78	0	0	2	0		3450	0	50	0	2.76	35	0	34	7	9	2	12	41.8571	12	1.91667	7.11462	5	13	4.9	4.2	2.70223	0	0	17041.2	14296.4	15507.5	149853	16282.9
478	0	0	32	Other	4	1	2	0	0	47	61	11.9	37.4	.	.	696.78	0	0	1	0		3035	0	48	0	2.74	34	0	33	8	9	2	7	38.5714	8	1.91667	9.66387	8	19	3.2	1.4	2.71047	0	0	17368.6	766.308	6693.4	183661	10349.8
398	0	0	26	Other	4	1	2	1	0	64	62	13.7	40	.	.	544.86	0	0	2	0		3450	0	50	0	2.76	34	0	34	9	10	1	7	39.5714	10	1.08333	5.81818	5	.	3.6	4	2.71056	0	0	18023.6	55.3336	10916.8	90329.9	12498.5
311	1	3	15	Student	4	1	1	1	0	52	63	11.7	35.3	11.1	32.9	549.69	0	0	2	0		2850	0	47	0	2.75	34	0	32	1	8	2	5	39.1429	12	2.66667	4.52675	20	25	5.2	5.4	2.71165	0	0	14748.9	6324.84	22485.3	0	16090.5
487	0	0	21	Student	4	1	1	0	0	48	62	12.8	38.4	12.4	38.5	577.37	0	0	1	0		3710	0	51	0	2.8	34	0	33	8	10	1	8	40.5714	25	2.83333	7.173	6	16	4	2.1	2.71446	0	0	17761.6	16838.7	11651.3	113446	17469.5
469	0	0	17	Housewife	3	1	2	1	0	54	74	10.9	32.3	12.6	37	677.98	0	0	1	0		3475	0	47	1	3.35	37	0	34	9	10	1	9	40.1429	25	3.66667	18.3824	5	29	.	1.1	2.73027	0	0	2370.57	9901.26	5775.26	65769.2	11344
128	1	2	18	Student	3	1	1	1	0	71	86	11.4	32.4	13.4	42	468.45	0	0	1	0		3450	0	49	0	2.93	34	0	35	9	10	1	8	40.1429	9	2.91667	2.7972	10	29	4.4	4.1	2.73193	0	0	17041.2	0	13304	70970.2	12851.3
173	1	3	14	Student	3	1	1	1	0	59	69	12.3	35.8667	13.2	40.9	606.85	0	0	1	0		3210	0	49	0	2.73	32	1	33	9	10	1	4	39.7143	22	2.91667	7.85714	6	17	3.3	3.7	2.73261	0	0	22411.7	6303.3	17527.4	17803.5	14807.6
16	1	2	28	Housewife	3	2	2	1	0	68	87	10.8	33.4	.	.	805.4	0	0	1	0		4170	0	52	0	2.97	37	0	36	8	9	2	3	40.2857	15	2.08333	8.29694	1	.	.	3.3	2.74107	0	0	28699.1	2382.16	18996.4	7401.34	18559.9
427	1	2	25	Housewife	4	1	2	1	0	60	68	12.05	37.4	12.3	38.9	614.95	0	0	1	0		3840	0	52	0	2.73	36	0	36	9	10	1	11	39.4286	13	2.83333	8.33333	9	40	3.5	1.5	2.74613	0	0	11343.2	6561.84	9080.54	125582	15898
397	0	0	33	Housewife	4	1	2	1	0	70	82	12.2	38.5	.	.	775.85	0	0	2	0		3890	0	52	0	2.77	35	0	36	8	9	1	5	41.7143	9	2.91667	5.94406	7	39	3.6	2.3	2.75211	0	0	7675.57	5635.41	6326.15	173547	16475.3
481	0	0	18	Student	4	1	1	1	0	69	71.4	11.7	36.4	.	.	520.83	0	0	2	0		3255	0	53	0	2.19	34	0	33	9	10	1	5	40.7143	15	2.75	5.78512	5	39	2.8	1.5	2.75883	0	0	12391.1	7509.8	7795.16	137429	11183.6
499	0	0	28	Other	4	1	2	0	0	60	69	12.9	39.5	11	33.2	660.35	0	0	2	0		2860	0	48	0	2.59	34	0	35	9	10	1	11	37	11	2	8.53659	6	12	4.3	2.9	2.76503	0	0	16844.7	16881.7	7060.65	123559	14871.8
510	0	0	16	Student	4	1	1	0	0	53	78	11.3	32.3	12.9	29.8	609.2	0	0	1	0		3720	0	51	0	2.8	34	0	36	8	9	1	10	39.7143	10	1.91667	3.4188	1	8	2.9	1	2.76932	0	0	16255.3	14985.8	6326.15	164301	11857.1
100	1	1	16	Housewife	4	1	1	0	0	40	49	.	.	10.1	29.5	403.25	0	0	2	0	1	2510	0	47	0	2.42	30	1	30	8	10	1	2	35.1429	17	1.91667	5.67686	10	30	5	4.4	2.77443	0	0	.	.	.	.	.
457	1	2	24	Housewife	3	1	2	1	0	58	67	.	.	10.8	36.1	521.35	0	0	1	0		3280	0	50	0	2.62	34	0	34	9	10	1	4	39.5714	5	1.91667	5.11628	.	60	3.6	1.7	2.778	0	0	10753.8	6475.66	12202.2	111134	15641.5
372	0	0	28	Other	3	1	2	1	0	51	59	11.4	33.2	10.8	30.8	493.45	0	0	1	0		2840	1	49	0	2.41	33	0	32	8	9	2	9	39.7143	15	2.83333	4.46097	3	6	4.1	2.6	2.78452	0	0	9771.37	12.2441	15874.7	58545.4	14871.8
166	1	2	18	Housewife	4	1	1	1	0	54	65	12.15	34.6	12.6	36.8	440.8	0	0	1	0		2945	0	48	0	2.66	33	0	32	9	10	1	6	35.5714	13	2.66667	12.5749	5	5	4.4	3.6	2.7968	0	0	16582.7	11323.2	5958.89	152165	10702.6
30	1	1	38	Other	4	1	2	1	0	69	78	11.55	34.6	10.6	33	1092	0	0	2	0		3520	0	50	0	2.82	34	0	34	8	10	1	6	40.5714	14	2.91667	7	8	12	4.5	4.1	2.81131	0	0	5383.29	0	20281.8	0	16122.5
521	0	0	27	Housewife	3	1	2	1	0	90	100	12.6	38.7	.	.	621.27	0	0	2	0		3225	0	49	0	2.74	33	0	33	9	9	2	8	38.5714	12	1.08333	1.21951	1	20	3.6	5.2	2.81213	0	0	3811.44	4364.27	12385.8	67502.9	10895
432	1	1	15	Student	3	1	1	1	0	50	56	10.2	31.4	10.4	31.3	538.03	0	0	1	0		2940	0	49	0	2.5	33	0	33	9	10	1	7	37.7143	4	2	3.61991	5	21	2.6	1.2	2.8126	0	0	11539.7	13520.8	8529.66	77038.2	16058.4
525	0	0	14	Student	3	1	1	0	0	47	64	12.6	37.8	11.5	35.2	327.15	0	0	1	0		2975	0	47	0	2.87	34	0	33	8	9	2	8	38.4286	13	1.08333	0.60241	1	12	4	3.2	2.82572	0	0	4204.4	7897.6	2102.73	143497	11247.8
69	1	4	16	Student	3	1	1	1	0	53	59.5	11.8333	34.1667	11	32.2	482.05	0	0	1	0		3150	0	49	0	2.68	36	0	33	8	9	2	9	37.8571	14	2.83333	10.2804	10	7	4.6	2.7	2.83217	0	0	26799.8	2748.42	25606.9	40630.5	17661.9
63	1	4	23	Housewife	4	1	2	1	0	50	68	10.5333	31.5667	10.3	31.6	510.96	0	0	1	0		3750	0	47	1	3.61	36	0	33	7	9	1	10	38.8571	18	2	2.04082	11	27	4.5	3.7	2.83366	3	2	15076.4	4407.36	20649	62590.7	16988.4
587	0	0	21	Housewife	3	1	2	0	0	54	76	.	.	13.2	40.4	619.89	0	0	2	0		3410	0	50	0	2.73	35	0	34	9	10	1	11	40.8571	11	2.75	9.30233	4	25	4	6.3	2.85208	0	0	8134.03	18756.1	7427.9	168057	15994.2
56	0	0	23	Other	4	1	2	0	0	45	62.5	11.8	33.7	11.8	34.3	606.3	0	0	2	0		3450	0	49	0	2.93	35	0	34	8	10	1	7	40.5714	22	1.91667	11.5607	1	11	2.8	3.3	2.85341	0	0	13111.6	1024.85	23770.7	0	12658.9
413	1	3	22	Other	4	1	1	1	0	51	61	11.95	32.9	.	.	510.29	0	0	2	0		3050	0	49	0	2.59	34	0	32	8	9	2	5	39.8571	14	1.91667	12.0603	4	15	4.2	3.2	2.85461	0	0	5448.78	12594.3	14038.5	133672	17437.4
505	1	3	17	Farmer	3	2	1	1	0	67	81	10.3	31.5	8.8	26.2	683.36	0	0	2	0		3650	0	50	0	2.92	35	0	36	9	9	2	8	39.2857	11	2.91667	21.1268	8	24	3	4.7	2.85668	0	0	10426.3	2597.61	24872.4	0	13685.1
597	0	0	40	Other	4	2	2	1	0	53	66.9	10.2	27.9	11.3	35.5	639.4	0	0	2	0		3790	0	50	0	3.03	36	0	35	9	10	1	5	39.7143	29	2.83333	9.96016	17	19	3.2	6.1	2.85832	0	0	12522.1	12809.8	7611.53	132228	14262.4
239	0	0	20	Housewife	3	1	2	0	0	58	73	12.1	36.25	12.7	37.4	629.87	0	0	2	0		2800	0	49	0	2.38	33	0	32	8	9	2	5	38.2857	7	1.91667	4.71698	4	14	4.5	4.7	2.86868	0	0	13046.1	2080.54	15140.2	26761	13268.2
538	1	4	27	Farmer	4	1	1	1	0	60	65.5	9.5	33.2	12.5	39.5	504.98	0	0	1	0		2660	0	47	0	2.56	32	0	31	9	10	1	3	33.4286	21	1.83333	.	3	.	3.5	5	2.87173	0	0	22215.2	4989.07	18629.1	47276.4	19425.8
259	0	0	18	Housewife	4	2	1	1	0	58	66	11.7	36	11.7	35	549.3	0	0	1	0		3150	0	49	0	2.68	36	0	33	8	9	2	6	41	9	2.83333	9.17031	6	9	4.3	2.9	2.89779	0	0	19464.5	20910.6	10182.3	84839.8	14422.8
566	1	1	13	Student	2	2	1	1	0	40	43	9.7	30.4	8.7	28.2	449.4	0	0	2	0		2540	0	47	0	2.45	31	1	31	7	8	1	3	37.1429	30	1.91667	5.30612	40	32	2.8	5.9	2.90735	1	1	8461.5	11064.7	9815.05	97842.6	14326.6
370	1	1	17	Student	3	1	1	1	0	54	54	11.8	35.3	12	36.2	609.1	0	0	2	0		2865	0	48	0	2.59	34	0	33	9	9	1	4	38.8571	6	2.91667	10.4869	7	31	.	2.3	2.90911	0	0	25358.9	4019.56	22118	3645	14743.5
590	0	0	18	Housewife	4	1	2	1	0	60	74	.	.	8.8	27.2	635.79	0	0	2	0		3260	0	49	0	2.77	34	0	33	9	10	1	.	39.4286	34	1.91667	9.09091	2	19	4.2	3.6	2.91076	0	0	22870.1	17657.4	3388.12	241739	10766.7
494	0	0	28	Other	4	1	2	1	0	64	80	12.9	39	.	.	633.68	0	0	2	0		3690	0	52	0	2.62	36	0	37.5	8	9	2	6	39.4286	18	1.91667	11.4537	1	10	4.9	2.7	2.91468	0	0	13832	5893.95	12753.1	16936.7	10285.6
101	0	0	19	Housewife	4	1	2	0	0	45	54	.	.	.	.	422.3	0	0	1	0		2775	0	47	0	2.67	32	0	32	9	9	2	2	38.1429	9	1.75	7.31707	2	15	3.8	3.2	2.91746	0	0	18482	.	.	.	.
453	1	1	19	Student	4	1	1	1	0	54	61	10.6	32.45	11.8	35.2	477.95	0	0	1	1	1	2480	0	46	0	2.55	33	0	30	9	9	1	6	35.5714	24	1.91667	6.06061	4	21	.	1.3	2.92079	0	0	30074.4	4644.35	23219.8	0	17020.5
141	0	0	33	Other	4	1	2	1	0	67	79	12.5	36.75	12	36.2	562	0	0	1	0		3460	0	52	0	2.46	36	0	36	9	9	2	15	40.2857	10	2.83333	2.07254	4	16	4	3	2.92408	0	0	13242.5	4924.44	14405.7	61434.9	14070
497	0	0	26	Housewife	3	1	1	1	0	46	56.8	11.95	36.25	12	37.1	727.9	0	0	2	0		2960	0	49	0	2.52	34	0	33	9	10	1	10	39.2857	8	1.83333	2.66667	2	22	3.7	2.8	2.9292	0	0	14224.9	16881.7	22301.7	70970.2	16026.3
310	1	2	26	Housewife	2	2	2	1	1	54	65	11.9	36.3	11.1	32.1	461.75	0	0	1	1	1	2405	1	43	1	3.02	34	0	31	8	9	1	5	40	4	3.83333	.	21	.	3.9	4.5	2.93104	0	0	3156.5	1412.65	21750.8	36874.2	12851.3
312	1	2	16	Housewife	4	2	1	1	0	45	63	12.8	38.6	10.9	32.5	457.38	0	0	2	0		3270	0	49	0	2.78	34	0	33	9	10	1	6	40.7143	36	2.75	20.283	15	27	3.5	5.4	2.935	0	0	27258.2	227.691	19363.6	0	12081.6
446	1	2	16	Student	4	1	1	1	0	50	71	13.6	41.5	10.6	32.2	855.73	0	0	1	0		3970	0	54	0	2.52	37	0	37	8	8	2	7	41.2857	11	1.91667	6.58436	8	19	.	3.2	2.93625	0	0	35052	0	31299.4	29361.5	14390.7
48	1	4	18	Student	4	1	1	0	0	47	63	11.5	33.9	.	.	337.57	0	0	2	1	1	2355	1	45	1	2.58	31	1	28	8	9	1	7	37.5714	13	2.75	9.23077	5	28	3.1	3.1	2.93703	0	0	36034.4	6238.66	31483	62012.8	19682.4
204	0	0	20	Housewife	4	1	1	0	0	70	82	12.75	38.05	13.1	39.4	532.91	0	0	2	0		3200	0	50	0	2.56	36	0	34	8	9	2	10	37.2857	10	2.08333	2.54237	17	4	5.7	5.5	2.93748	0	0	12718.6	11452.5	7244.28	133672	11344
385	1	4	28	Farmer	3	2	2	1	0	54	65	12.55	38.25	11.7	36.1	363.8	0	0	1	0		2695	0	48	0	2.44	34	0	32	9	9	1	3	38	11	1.91667	3.9604	7	28	.	3.3	2.94194	0	0	11474.2	1218.75	9080.54	94953.1	16956.4
327	1	2	21	Farmer	3	2	2	0	0	56	64	9.2	26.5	10	32.4	560.57	0	0	1	0		3620	0	50	0	2.9	34	0	33	9	10	1	6	40.4286	23	2	20.9964	9	26	4	4.9	2.95307	0	0	25162.4	4062.65	14222.1	71548.1	12049.5
363	0	0	36	Other	4	1	2	1	0	88	101	12.4	37.1	.	.	786.8	0	0	1	0		3675	0	52	0	2.61	35	0	34	8	9	2	9	37.7143	7	2	4.54545	2	9	3.6	6.2	2.95511	0	0	23590.6	12443.5	13120.3	109112	16314.9
483	0	0	18	Student	4	1	1	1	0	57	70	12.5	37.75	12.2	36.2	498.85	0	0	2	0		3590	0	49	0	3.05	35	0	33	8	9	2	8	40.7143	17	2	15.6627	11	37	3.8	2.8	2.96309	0	0	9836.86	19919.5	10182.3	120381	11664.7
491	0	0	33	Other	4	1	2	0	0	64	74.9	12.55	35.55	12.4	36.9	489.85	0	0	2	0		2725	1	48	0	2.46	34	0	32	8	9	2	8	39.8571	10	1.83333	3.81356	2	11	4.3	1.7	2.9647	0	0	12260.1	19402.5	8162.41	129049	13460.6
276	1	2	25	Housewife	3	2	2	1	0	46	56	10.25	29.95	11.7	35.3	435.15	0	0	1	1	1	2355	0	48	0	2.13	32	0	22	9	10	1	5	35.7143	9	2.08333	9.96016	9	15	4.4	3.3	2.96792	0	0	4400.88	8263.86	1735.48	125871	8842.46
496	0	0	17	Student	4	1	1	0	0	46	59	10	30.45	10.4	32.3	518.95	0	0	2	0		2940	0	49	0	2.5	34	0	32	6	9	2	10	41.2857	9	1.91667	7.52688	1	9	3.7	2.5	2.96832	0	0	10229.8	18885.4	10733.2	127026	14198.3
300	1	1	37	Other	4	1	2	1	0	76	86.5	12.55	.	12.7	38.6	773.82	0	0	2	0		4095	0	51	0	3.09	34	0	36	8	10	1	6	37.5714	32	1	6.48464	26	27	3.2	5.6	2.97372	0	0	10819.3	18928.5	11651.3	122403	14968
236	0	0	18	Student	4	1	1	0	0	56	79	10.6	31.7	11.4	34.2	611.67	0	0	1	0		3560	0	50	0	2.85	37	0	35	7	9	2	9	39.5714	14	1.83333	2.28311	9	19	4.8	6.1	2.98028	0	0	7937.55	0	7244.28	98131.5	11793
470	0	0	18	Housewife	3	1	1	1	0	52	70	11.1	31.1	11.3	33.6	663.3	0	0	1	0		3345	0	49	0	2.84	34	0	33	9	9	2	8	38	12	1.83333	6.76692	10	16	3.6	3.6	2.98044	0	0	7675.57	11560.2	13854.8	109689	17950.6
155	0	0	22	Student	4	1	2	1	0	67	83	12.9	38.9	.	.	761.75	0	0	2	0		4090	0	53	0	2.75	38	0	37	5	9	2	6	39.8571	13	2.08333	8.98876	5	28	3.8	5.6	2.98373	0	0	8985.45	20350.4	13304	119514	12049.5
490	0	0	26	Other	4	1	2	1	0	58	72	12.2	36.65	13.3	41	588.6	0	0	1	0		3320	0	48	0	3	33	0	34	9	10	1	10	39.4286	16	1.91667	8.07692	1	11	4	3.2	2.9889	0	0	20839.8	4493.54	21199.9	18959.3	15609.4
438	0	0	24	Housewife	4	2	1	1	0	63	79	12.2	37.1	12.9	40.1	657.58	0	0	2	0		3400	0	50	0	2.72	35	0	35	9	10	2	11	41.1429	17	1.83333	4.58333	16	53	3	2	2.99084	0	0	7282.61	10332.2	13671.2	92352.5	17373.3
489	0	0	39	Other	2	1	2	1	1	54	56	10.9	34	11.4	34.6	573.35	0	0	2	0		3340	0	49	0	2.84	34	0	34	8	9	2	6	39.5714	10	1.91667	1.09091	11	21	4.7	3	2.99323	0	0	7479.09	8867.11	5408.01	86284.6	11408.1
386	0	0	24	Housewife	4	1	2	0	0	71	85	11.55	36.6	.	.	730.32	0	0	1	0		3330	0	51	0	2.51	36	0	34	4	9	2	9	39	21	2.08333	12.5	5	4	3.3	5.1	2.99809	0	0	15927.8	6109.39	13854.8	72126	13204.1
513	0	0	18	Student	4	1	2	0	0	54	77	11.7	35.1	9.7	30.4	748.85	0	0	2	0		4050	0	51	0	3.05	36	0	36	9	10	1	9	40.5714	14	2	10.628	6	18	4.1	4.9	2.99855	0	0	16844.7	37241.5	9080.54	181927	9772.51
192	1	3	24	Housewife	4	1	2	1	0	63	68.8	11	30.1	.	.	882.1	0	0	1	0		3520	0	51	0	2.65	36	0	35	8	9	2	6	39.7143	15	2.83333	9.67742	19	42	4.2	6	2.99911	0	0	14945.4	9405.74	41398.8	5956.59	14903.8
49	1	3	25	Housewife	3	1	2	1	0	53	58	12.1	37.25	11.6	35.2	551	0	0	2	0		3060	0	46	1	3.14	32	1	35	9	10	1	8	39.1429	7	2	4.09091	9	39	3.6	5.5	3.00076	0	0	40684.4	507.772	21383.5	0	13941.7
301	0	0	30	Housewife	4	1	2	1	0	69	82.6	13.65	42.9	12.6	38.5	760.35	0	0	1	0		3730	0	50	0	2.98	35	0	35	9	9	2	10	39.5714	31	2	15.7068	2	5	4.3	7.6	3.01368	0	0	23983.5	12098.8	18445.5	125582	13717.2
306	0	0	28	Housewife	3	1	2	0	0	49	66	11.0667	35.7333	12.4	37.9	714.15	0	0	1	0		3225	0	50	0	2.58	34	0	34	9	9	2	11	41.1429	8	2.08333	3.6	2	7	4.5	2.4	3.01838	0	0	5907.24	34763.8	6877.02	159389	10189.4
272	0	0	29	Housewife	4	2	2	1	0	53	68	12.4	35.35	.	.	532.93	0	0	1	0		3040	0	53	0	2.04	34	0	33	5	6	1	8	40.7143	9	1.91667	8	5	26	5.6	4	3.02687	0	0	11867.2	4041.1	10733.2	162278	15994.2
389	1	3	15	Housewife	3	1	1	1	0	39	48	13	40	12	36.2	644.19	0	0	1	0		3190	0	48	1	2.88	35	0	34	9	9	2	5	42.2857	21	2.83333	3.87324	8	18	2.5	2.7	3.03181	1	0	7217.11	6174.03	7795.16	185972	11376
10	1	2	17	Student	3	1	1	1	0	42	.	.	.	.	.	405.52	0	0	.	.		.	.	.	.	.	.	.	.	.	.	2	.	40	11	2.83333	20.6897	5	.	.	1.3	3.03624	0	0	.	.	.	.	.
553	1	1	28	Housewife	3	1	2			50	75	7.33333	23.9333	10.1	31.4	562.46	0	0	2	0		3065	0	49	0	2.61	35	0	34	8	9	2	8	39.8571	13	2	4.5977	7	8	4	4.1	3.03933	0	0	5579.77	12745.2	6509.77	122692	11023.3
486	0	0	26	Housewife	3	1	2	0	0	60	75.5	10	30.7	8.7	27.8	720.44	0	0	2	0		3850	0	50	0	3.08	36	0	36	9	10	1	5	40.1429	12	2.83333	8.96226	6	20	4	4.1	3.04397	0	0	13766.5	34613	12569.4	167190	15769.7
514	0	0	17	Housewife	3	1	2	0	0	45	53	11.55	34.8	.	.	503.8	0	0	1	0		3305	0	49	0	2.81	35	0	35	9	10	2	7	38.7143	4	1.08333	9.28962	5	12	4.3	4.6	3.04885	0	0	29419.5	6906.55	18078.2	78771.9	13300.3
589	0	0	21	Housewife	4	1	1	1	0	63	82	10.4	35.5	11.2	35.8	655.71	0	0	2	0		3445	0	50	0	2.76	36	0	34	8	9	2	10	40.5714	20	2.75	4.2735	11	9	3.9	7.1	3.06921	0	0	7020.63	23926.9	7244.28	126449	12819.2
364	0	0	19	Housewife	4	1	1	0	0	60	73	12.7	38.4	.	.	666.32	0	0	1	0		3145	0	48	0	2.84	34	0	34	9	10	1	10	39.8571	15	2.91667	17.3333	3	19	3.9	3.2	3.06996	0	0	49919.1	4407.36	25974.2	0	16347
442	1	4	18	Student	4	2	1	1	0	52	63	9.9	29.75	11.1	35.4	577.35	0	0	1	0		3630	0	50	0	2.9	35	0	35	6	9	1	4	40.5714	22	2	4.16667	18	12	4.5	4	3.07092	0	0	53324.7	658.585	25974.2	0	16956.4
482	0	0	36	Other	4	1	2	0	0	83	91	12	37.5	.	.	502.17	0	0	2	0		2920	0	49	0	2.48	34	0	33	9	10	2	10	39.1429	13	2.75	10.6742	6	9	5.1	5.4	3.07495	0	0	14748.9	5764.68	16976.5	68947.6	13332.4
284	1	1	23	Student	4	1	1	0	0	59	71	14.2	40.9	13.6	41.6	513.3	0	0	2	0		3460	0	50	0	2.77	34	0	36	9	9	2	10	40.7143	18	1.83333	1.73913	20	14	3	6.3	3.07849	0	0	26144.8	4299.64	21016.3	39763.7	18046.8
334	1	1	33	Housewife	4	2	2	1	0	84	94	11.9	38	11.9	36.4	481.45	0	0	2	0		3215	0	49	0	2.73	35	0	32	8	9	2	7	40	16	1	9.43396	7	28	6.4	3.6	3.082	0	0	21429.3	12098.8	21934.4	25605.2	12626.8
297	0	0	26	Housewife	4	1	2	0	0	55	64	12.9	37.3	.	.	494.81	0	0	2	0		2980	0	48	0	2.69	34	0	33	9	9	2	11	40.2857	13	1	5.08475	5	17	4.8	2.1	3.082	0	0	10360.8	658.585	10733.2	92063.6	14230.3
164	0	0	24	Other	4	1	2	0	0	59	80	12.85	38.35	12	36	482.75	0	0	2	0		2890	0	50	0	2.31	34	0	34	9	9	2	12	39	11	1.83333	14.8325	3	21	4.2	4.6	3.08713	0	0	21101.8	4041.1	16058.4	110845	13621
439	0	0	37	Housewife	4	2	2	1	0	60	79	11.55	34.8	.	.	682.62	0	0	2	0		3960	0	52	0	2.82	36	0	35.5	8	9	2	11	41.4286	8	2	3.94737	7	8	2.7	2.7	3.09992	0	0	17041.2	2942.32	8162.41	109401	14390.7
466	0	0	16	Student	4	2	1	1	0	55	61.8	9.5	30.4	10.8	34.3	487.7	0	0	1	0		2530	1	48	0	2.29	33	0	33	8	10	1	8	38	21	2.75	26.7925	1	38	3.6	2.5	3.10253	0	0	33087.2	701.675	19363.6	30517.3	16186.7
283	1	2	26	Housewife	4	1	2	1	0	50	66	10.6333	33.0667	13	40.5	634.61	0	0	1	0		3385	0	52	0	2.41	34	0	33	8	9	2	8	39	11	1.91667	6.75105	7	9	.	1.3	3.10416	0	0	30991.4	1326.47	29463.1	19537.2	16667.7
460	0	0	22	Housewife	4	1	1	1	0	62	80	11.1	32	.	.	379	0	0	1	0		2900	0	48	0	2.62	33	0	32	9	10	1	9	39.4286	8	1.91667	7.69231	5	13	2.4	1.6	3.10614	0	0	10033.3	4622.81	11100.4	127893	9932.86
477	0	0	29	Other	4	1	2	0	0	75	87	11	33.6667	11.4	36.2	816.4	0	0	2	0		4435	0	50	0	3.55	37	0	37	8	9	2	8	40.4286	19	1.91667	2.40964	2	20	2.6	1.7	3.10681	0	0	18023.6	2468.34	17343.7	75593.4	13460.6
445	1	1	14	Student	3	1	1	1	0	48	68.4	12.5	37.6	11.7	35.9	519.98	0	0	2	0		3205	0	51	0	2.42	34	0	33	9	10	1	6	40.4286	8	2	10.7527	5	14	3.3	1.9	3.1104	0	0	5907.24	14231.7	11284.1	162278	14070
68	1	2	34	Housewife	2	1	2	1	0	58	63	12.75	38.5	13	39.4	605.32	0	0	1	0		3040	0	50	0	2.43	34	0	32	8	10	1	4	36.5714	22	1.91667	11.2033	2	22	4.9	4.5	3.11059	0	0	15338.3	464.683	18445.5	24160.4	15962.2
317	1	1	38	Housewife	3	2	2	1	1	57	72.9	.	35.6	12.7	37.2	555.67	0	0	1	0		3480	0	50	0	2.78	35	0	35	8	10	1	7	38.8571	12	1.91667	7.56972	16	25	6.2	2.9	3.11464	0	0	25227.9	1886.63	18261.9	122403	14615.2
340	1	2	16	Housewife	3	1	1	0	0	44	57	12.3	36.4	.	.	402.75	0	0	1	1	1	2440	1	46	1	2.51	35	0	29	8	9	2	9	39.7143	12	3.75	7.72532	9	21	3.5	2	3.12369	0	0	5776.25	3739.48	6877.02	157944	14422.8
534	0	0	37	Other	4	1	2	0	0	65	75	12.8	38.1	12.9	38.7	590.14	0	0	1	0		3640	0	49	0	3.09	34	0	33	9	10	1	6	38	17	1.91667	0.438596	3	34	5.4	6.1	3.13294	0	0	11736.2	895.577	13120.3	46120.6	15256.6
120	1	4	19	Student	4	1	2	1	0	52	73	11.9	35.3	10.6	32.7	502.53	0	0	1	0		2910	0	47	0	2.8	34	0	33	8	9	2	5	37.2857	21	2.75	20.3463	11	11	4.5	2	3.13435	0	0	10229.8	10741.5	10733.2	64324.4	13781.4
232	0	0	32	Other	4	1	1	1	0	64	66	12.75	36.6	11.7	36	484	0	0	1	0		2805	1	50	0	2.24	34	0	33	8	9	2	10	40.2857	16	3	3.66972	13	25	4.6	5.2	3.13486	0	0	15796.8	3157.77	11467.7	113446	14326.6
267	0	0	21	Other	4	1	1	0	0	57	69	13.2	.	9.5	28.1	450.1	0	0	2	1		1815	0	43	0	2.28	29	0	.	8	9	1	5	33.1429	14	1.08333	2.47525	6	23	6	3.1	3.14037	0	0	7020.63	11689.5	45622.2	48432.2	18335.4
322	1	1	20	Student	3	1	2	1	0	75	84.9	12	36.8	13.2	39.7	499.28	0	0	2	0		2980	0	50	0	2.38	34	0	34	8	9	2	7	40.4286	22	1.91667	8.8	8	16	3.3	4.8	3.15004	0	0	21429.3	11603.3	17894.6	29072.6	15032.1
375	0	0	34	Housewife	4	1	1	0	0	52	62	12.2	37.2	.	.	487.85	0	0	1	0		2740	0	48	0	2.48	33	0	32	8	9	2	8	37.1429	12	2.83333	7.20339	11	56	2.9	4.2	3.15155	0	0	10164.3	6734.19	39195.3	40630.5	19169.2
476	0	0	18	Housewife	4	1	1	1	0	44	55	11.7	36.75	12	36.5	588.18	0	0	2	0		2745	0	48	0	2.48	34	0	33	9	9	2	7	38.7143	5	2.75	11.3821	8	44	3.1	0.8	3.15782	0	0	20905.3	22591.1	11651.3	105644	10959.1
270	1	1	15	Housewife	3	2	2	1	0	49	57	10.2	32.4	.	.	565.05	0	0	1	0		3500	0	49	0	2.97	35	0	35	9	9	2	3	40.1429	18	1.91667	3.65297	2	5	3.8	2.4	3.17744	0	0	7610.08	10052.1	9080.54	116913	13011.7
382	1	2	14	Student	4	1	1	0	0	68	75	12.35	.	.	36.8	584.3	0	0	2	0		3315	0	51	0	2.5	34	0	34	9	9	2	8	39.7143	10	1.75	12.766	5	10	3.1	4.1	3.18118	0	0	14814.4	1606.55	12753.1	24738.3	9932.86
264	0	0	32	Other	4	1	2	0	0	65	76	13.8	42.4	12.8	39.2	678.56	0	0	1	0		3080	0	48	0	2.79	32	1	32	9	10	1	6	39	15	1.91667	2.25564	4	4	3.7	3.9	3.18225	0	0	6038.23	21686.2	17343.7	121247	18078.8
149	0	0	21	Student	4	1	1	0	0	53	68	10.8	33.1	11.6	34.5	423	0	0	2	0		2980	0	48	0	2.69	34.5	0	34	7	9	2	8	40.4286	11	2.75	11.0619	5	13	4.1	4.1	3.18524	0	0	14683.4	16407.8	9264.17	110267	13268.2
183	0	0	22	Other	4	1	1	1	0	75	88.5	13	38.9	12.5	37.9	645.9	0	0	2	0		3840	0	51	0	2.89	35	0	35	9	10	1	10	39.2857	11	2.91667	4.4	4	20	4.6	2.7	3.18534	0	0	6889.64	22354.1	7427.9	49876.9	16475.3
342	0	0	26	Housewife	4	1	2	1	1	62	73	12.4	36.2	10.9	32.5	553.09	0	0	1	0		2970	0	48	0	2.69	32	0	33	9	9	1	5	36.5714	16	1.91667	2.7451	9	20	5.5	5.9	3.18721	0	0	7544.58	9491.91	20465.4	97553.6	15096.3
293	1	5	30	Housewife	3	1	2	0	0	59	64	11.2	34.3667	11.4	34.4	499.27	0	0	2	0		2830	1	50	0	2.26	35	0	34	8	9	2	9	41.8571	14	2.75	9.04255	15	14	4.6	4.1	3.19044	3	1	38130.2	6152.49	9080.54	67502.9	13941.7
225	1	1	34	Farmer	1	2	2	1	1	65	73	11.9	34.9	11.6	36.6	725.3	0	0	1	0		3920	0	51	0	2.96	37	0	36	9	10	1	9	41.1429	13	3	18.3406	8	34	4.5	4.7	3.20111	3	1	32366.7	917.121	14589.3	49876.9	10157.4
180	0	0	20	Other	4	1	1	1	0	51	71	12.5	39.1	13.6	41.2	621.8	0	0	2	0		3020	0	47	0	2.91	34	0	34	9	9	2	10	39	32	1.83333	5.64103	7	24	4	4.9	3.20357	0	0	30336.4	5786.22	20465.4	0	16250.8
187	0	0	30	Housewife	3	1	2	0	0	55	71.1	12.85	37.45	.	.	447.56	0	0	2	0		2670	0	47	0	2.57	33	0	32	8	9	2	10	36.5714	13	1	0.420168	3	9	3.9	3.6	3.21361	0	0	16779.2	7014.27	25606.9	6245.54	19169.2
179	0	0	19	Housewife	2	1	2	1	0	55	68.3	10.3	31.5	.	.	513.05	0	0	1	0		3700	0	49	0	3.14	36	0	35	9	10	1	10	41.2857	8	3	17.7215	12	47	3.2	3.3	3.21369	0	0	45989.4	16709.4	12385.8	121536	13909.6
565	1	1	17	Student	4	2	1	1	0	50	58	11.0667	32.9333	10.7	32.6	578.56	0	0	2	0		3130	0	49	0	2.66	34	0	34	9	10	1	7	41.2857	15	2	14.2132	10	25	4.8	4.1	3.21432	0	0	864.217	12766.7	5775.26	137718	14935.9
185	0	0	16	Student	4	1	1	0	0	45	60	11.9	36.45	.	.	644.85	0	0	2	0		3420	0	49	0	2.91	33	0	34	9	10	1	10	40	13	1.91667	9.80392	22	68	3.8	4.9	3.2205	0	0	16517.2	5850.86	22852.5	37741	9548.01
26	1	1	16	Student	4	1	1	1	0	60	72	8.4	26.5	8.5	25.8	592.6	0	0	2	0		3375	0	48	0	3.05	34	0	34	8	9	1	1	40.2857	24	2.75	10.0437	12	19	3.3	3.7	3.22279	0	1	16124.3	723.22	13304	276702	14037.9
252	0	0	24	Other	4	1	2	1	1	55	62.5	12	35.4	.	.	495.6	0	0	1	0		3530	0	50	0	2.82	34	0	35	9	10	1	7	39.5714	6	1.83333	9.96169	.	10	5.4	3.5	3.22702	0	0	23394.1	6324.84	6693.4	115757	16860.1
109	1	3	18	Student	3	1	1	1	0	44	52	9.45	28.4	.	.	484.24	0	0	2	1	1	2300	1	47	1	2.22	33	0	29	7	8	1	9	39.5714	15	2.91667	.	11	.	5.3	5.4	3.22903	0	0	19071.5	2231.35	14773	103622	17790.2
224	1	1	14	Housewife	2	1	1	1	0	40	55	.	38	9.3	27.7	518.72	0	0	2	0		3080	0	46	1	3.16	33	0	33	8	9	1	6	39.7143	11	3.83333	17.0213	14	36	4.8	3.8	3.23985	0	0	21298.3	2209.8	25423.3	7979.24	18624
177	0	0	34	Other	4	1	2	1	0	85	97	11.5	.	11	34.8	917	0	0	1	0		3395	0	50	0	2.72	35	0	33	8	9	2	8	38.4286	22	2	5.26316	5	6	4.1	5	3.24112	0	0	10622.8	11926.5	16792.9	89174.1	15320.8
97	1	3	19	Housewife	3	1	2	1	0	74	.	10.1	31.3333	.	.	612.05	0	0	2	0		3460	0	49	0	2.94	35	0	34	9	10	1	11	40.5714	7	2.75	8.37696	7	26	2.9	3	3.24279	0	0	13308	6238.66	18261.9	74148.7	15032.1
282	1	3	28	Other	4	1	2	1	0	88	99	11.5	33.85	12.3	36.4	426.64	0	0	2	1	1	2190	1	45	1	2.4	32	0	30	9	9	2	3	36.8571	19	1.91667	7.55396	7	14	3.3	4.8	3.24288	0	0	22542.7	7315.9	18629.1	57678.6	13621
62	1	1	28	Housewife	2	1	2	1	0	73	.	.	.	.	.	1235.7	0	0	1	0		3100	0	50	0	2.48	32	0	33	9	10	1	5	38.4286	8	2.25	9.91736	9	.	.	.	3.24791	0	0	7479.09	1261.84	22485.3	0	12690.9
103	1	2	40	Other	3	1	2	1	0	52	65	11.7	34.6	10.8	32.4	377.62	0	0	2	1	1	1900	1	42	1	2.56	30	1	30	8	9	2	7	35.1429	13	1.91667	.	3	.	.	.	3.24903	0	0	12260.1	1089.48	18078.2	16647.7	13364.4
371	0	0	27	Housewife	3	1	2	1	0	60	77.6	11.75	36.45	.	.	544.75	0	0	2	0		3460	0	48	0	3.13	36	0	35	8	9	2	8	40.2857	21	2	5.30612	3	12	2.7	2.2	3.25422	0	0	14683.4	5269.15	9815.05	96686.8	11600.5
405	1	2	19	Housewife	4	2	2	1	0	49	64	10.85	32.45	10.2	30.7	630.02	0	0	1	0		3330	0	50	0	2.66	36	0	34	9	10	1	10	41.1429	27	2.91667	13.4058	7	14	.	4.3	3.25904	3	1	36165.4	0	21567.1	10290.8	15930.1
257	0	0	24	Student	4	1	2	1	0	49	57	13.3	38.3	11.2	32.4	484.82	0	0	2	0		2850	1	49	0	2.42	34	0	34	9	9	2	7	41.8571	18	2.75	0	20	13	3.9	4.8	3.26246	0	0	22018.7	1477.28	16425.6	0	16603.6
501	0	0	28	Other	4	1	1	1	0	57	70	13.5	40.65	12.8	39.7	648.52	0	0	1	0		3160	0	51	0	2.38	33	1	35	.	.	1	8	40.8571	27	2.91667	6.07477	3	28	3.7	1.5	3.26704	0	0	27389.2	11000	14773	62301.8	11472.3
475	0	0	21	Housewife	3	1	1	1	0	40	62.5	12.35	38.05	11.6	35.9	655.22	0	0	1	0		3695	0	50	0	2.96	34	0	34	9	10	1	9	38.8571	23	1.08333	12.8205	3	12	2.8	.	3.26715	0	0	23656.1	9211.83	29095.8	21848.8	12819.2
366	0	0	18	Housewife	4	1	1	1	0	95	108	12.3	37.6	.	.	580	0	0	2	0		4250	0	52	0	3.02	35	0	.	.	.	1	3	41	17	1.91667	9.85915	7	3	4.9	9.7	3.27191	0	0	16648.2	5850.86	7795.16	56233.8	14519
351	1	2	20	Housewife	4	1	2	1	1	55	74.9	13.1	40.5	11.7	37.2	450.8	0	0	1	0		3260	0	49	0	2.77	34	0	33	9	10	1	4	41.4286	16	2.83333	10.4377	6	19	3	1.3	3.27492	0	0	15731.3	4558.18	8346.04	127315	10413.9
472	1	1	27	Other	3	1	2	0	0	49	60	11.6	33.6	.	.	546.55	0	0	2	0		3090	0	48	0	2.79	34	0	34	9	10	1	3	40.2857	14	2.83333	5.76923	1	24	3.2	2.3	3.28303	0	0	14028.5	16235.4	19547.3	53055.4	15000
251	0	0	20	Student	4	1	1	1	0	57	62	12.9	38.7	14.1	41.9	628.05	0	0	1	0		3420	0	47	1	3.29	34	0	33	9	10	1	7	39.8571	10	2	6.43777	5	12	3.7	3.6	3.28767	0	0	29550.5	0	14038.5	41786.3	12947.5
238	0	0	15	Student	4	1	1	1	0	54	70	12.8667	38.3333	13.6	41.7	547.55	0	0	1	0		3120	0	51	0	2.35	33	1	32	9	10	1	9	41.1429	6	2.83333	8.97436	6	27	4.3	4.4	3.30086	0	0	14224.9	4127.28	15507.5	91774.6	14422.8
145	1	1	20	Housewife	3	2	2	1	0	62	77	12.3	37.15	11.3	37.3	638.8	0	0	1	0		3830	0	50	0	3.06	34	0	34	8	10	1	4	40.2857	8	2.83333	8.75	6	21	5.7	2.5	3.30952	0	0	13177	3524.03	20465.4	0	17597.8
426	0	0	32	Other	4	1	1	1	0	48	69.2	14.3	42.7	14.8	45.4	573.77	0	0	2	0		3220	0	50	0	2.58	36	0	33	8	9	2	10	41.7143	12	1.91667	4.8583	7	12	3.1	3.3	3.31361	0	0	9050.94	550.861	12202.2	38318.9	14005.9
188	0	0	28	Other	3	1	2	0	0	75	71	12.3	36.9	12.2	35.5	419.3	0	0	1	0		3125	0	49	0	2.66	33	0	33	8	9	1	8	40.2857	17	1.91667	11.5607	4	15	4	4.6	3.32211	0	0	15796.8	11538.7	6877.02	55655.9	13460.6
136	0	0	30	Other	4	1	2	0	0	73	84	11.1	33.55	11.3	35.3	591.7	0	0	2	0		3600	0	50	0	2.88	35	0	36	9	10	2	7	41.1429	5	1.16667	10.0386	7	8	3.4	3.4	3.32771	0	0	24638.5	6777.28	22301.7	2200.25	14294.5
437	0	0	15	Student	4	1	1	1	0	55	79.5	12.4	36	11.7	36.5	514.85	0	0	1	0		3515	0	50	0	2.81	35	0	34	8	10	1	6	39.1429	7	1.91667	3.43137	10	36	3	3	3.3295	0	0	7479.09	3782.57	16058.4	51321.7	14743.5
158	0	0	20	Housewife	4	1	2	1	0	51	69	12.95	38.95	11	36.5	576.58	0	0	1	0		3010	0	51	0	2.27	34	0	35	8	9	2	4	40.8571	21	2.83333	20.1613	2	13	4.2	5	3.33135	0	0	27192.7	3524.03	11100.4	52188.5	14679.3
14	1	2	17	Student	4	2	1	1	0	52	64	9.85	29.7	.	.	565.7	0	0	2	0		2810	1	46	1	2.89	34	0	33	9	9	1	6	41.5714	19	3.75	18.7919	14	31	5.2	7.6	3.33686	0	0	20381.4	249.236	19730.9	3645	15192.5
220	0	0	33	Other	4	1	2	0	0	67	88	11.85	37.15	11.8	36.5	412.6	0	0	2	0		3055	0	48	0	2.76	33	0	34	8	9	2	5	39	11	1.91667	4.05904	3	17	5.1	4.2	3.34108	0	0	17172.2	2619.15	13671.2	114891	15352.8
47	1	3	20	Housewife	4	1	1	1	0	84	90	.	.	.	.	610.9	0	0	1	0		3545	0	49	0	3.01	36	0	.	6	9	2	3	38	18	1.83333	3.74332	4	19	2.7	6.6	3.34497	0	0	.	.	.	.	.
349	0	0	24	Housewife	4	1	1	0	0	55	69	11.8	35.8	11.6	33.8	756.1	0	0	2	0		3530	0	50	0	2.82	36	0	35	9	10	2	10	40.7143	15	1.91667	5.95238	2	7	3.6	1.2	3.3483	0	0	15534.8	16429.3	10182.3	128182	13492.7
91	1	3	19	Housewife	3	2	1	1	0	60	67	10.8	32.45	11	33.6	603.5	0	0	1	0		3690	0	50	0	2.95	34	0	34	8	9	1	4	39	31	2	4.52489	6	16	4.6	7.4	3.36197	0	0	.	.	.	.	.
231	1	3	23	Housewife	3	1	2	1	1	53	64	11.7	35.7	.	.	652.55	0	0	1	0		3640	0	51	0	2.74	34	0	37	8	9	1	9	39.4286	13	2	3.90625	14	55	4.5	5.8	3.36842	3	1	27520.2	0	16242	0	11696.8
511	0	0	20	Housewife	4	1	1	1	0	63	80	13.1	39.9667	13.7	41.7	678.38	0	0	2	0		3330	0	52	0	2.37	34	0	35	9	9	2	8	40.5714	15	2	7.56303	2	36	3.5	1.6	3.3688	0	0	24442	2769.97	19363.6	77905	13524.8
88	1	3	22	Housewife	4	2	2	1	0	82	89.5	10.8	30.9	12.9	37.7	663.8	0	0	2	0		3710	0	51	0	2.8	34	0	36	8	9	2	8	39.2857	6	1.08333	1.53061	11	14	3.7	4.3	3.37111	0	0	28371.6	2942.32	17160.1	0	13332.4
255	1	5	17	Student	4	1	1	1	0	52	64	13.1	38.7	13.7	41.7	532.6	0	0	1	0		3210	0	48	1	2.9	33	1	33	9	10	1	9	40.8571	21	1	5.14706	10	34	4.4	4.1	3.37284	3	.	16582.7	1046.39	18261.9	6823.44	17180.9
425	1	1	24	Housewife	4	1	1	1	0	56	73	12.55	40	12.3	37.9	390.83	0	0	2	0		2930	0	48	0	2.65	32	1	33	9	9	2	8	40.8571	15	2	0.869565	15	32	4.5	4.2	3.3775	0	0	19399	7811.43	18261.9	129627	15352.8
329	1	1	16	Farmer	3	2	1	1	0	43	49	4.9	16.7	.	.	540	0	0	.	.		.	.	.	.	.	.	.	.	.	.	2	.	39.5714	6	1.91667	1.34529	5	8	5.4	6.7	3.37954	0	0	10164.3	0	24137.9	1333.4	13845.5
11	1	1	24	Housewife	3	1	2	1	1	45	59	11.4	34.2	9.5	29.9	541.4	0	0	1	1	1	2480	0	48	0	2.24	33	0	31	7	8	2	5	36.1429	13	2	12.8889	15	23	.	0.7	3.39177	0	0	19464.5	3480.94	11834.9	200131	11825
249	1	3	26	Housewife	3	1	2	1	0	44	55	10.95	31.85	11	33.8	553.56	0	0	2	0		2900	0	48	0	2.62	32	0	33	9	10	1	3	38	16	2.16667	7.40741	2	15	7.2	4.4	3.41597	0	0	16910.2	6540.29	27626.8	16358.8	19810.7
434	0	0	19	Housewife	4	1	1	1	0	47	60	12.7	38.1	14.2	45.1	534.2	0	0	1	0		3700	0	51	0	2.79	35	0	36	9	9	2	10	42.7143	28	2.83333	10	2	19	3.8	4	3.41968	0	0	4662.86	615.495	13487.6	31384.2	15545.2
82	1	1	17	Student	4	1	1	1	0	51	66	8.1	24.5	8.8	26.9	497.8	0	0	2	0		2840	0	48	0	2.57	31	1	32	7	9	1	6	38.7143	5	3.08333	5.09259	6	20	5	3.3	3.4289	0	0	.	.	.	.	.
266	0	0	20	Student	4	1	2	1	0	40	49	12.3	39	12.2	36.2	459.56	0	0	1	0		3400	0	50	0	2.72	33	1	34	9	10	1	5	41.4286	14	2.08333	4.05904	11	25	4.4	4.4	3.43418	0	0	14814.4	1563.46	15691.1	80794.5	14422.8
423	1	2	19	Housewife	4	1	1	1	0	66	79	25.05	38.3	11.3	34.7	799.42	0	0	1	0		3780	0	50	0	3.02	33	0	34	8	9	1	7	39.5714	21	2.75	10.2041	13	7	2.9	2.5	3.43465	0	0	30401.9	809.398	14222.1	0	15962.2
554	1	3	19	Housewife	3	2	2	1	1	45	54	8.2	23.4	10.4	31.9	420.95	0	0	2	0		2960	0	48	0	2.68	32	0	33	9	10	1	4	38.1429	22	3.75	9.5	5	24	4	1.8	3.43503	0	0	5383.29	17894.3	5775.26	171236	17116.7
33	0	0	27	Housewife	4	1	2	0	0	41	53	.	39	11.3	35.1	553.5	0	0	2	0		3975	0	49	0	3.38	35.5	0	34	9	10	2	6	40.1429	11	2.08333	2.14592	1	14	3	3.6	3.43735	0	0	13635.5	4148.83	15874.7	32540	16571.5
591	1	4	33	Housewife	4	1	2	1	0	57	68	.	36.9	.	.	744.5	0	0	1	0		3510	0	52	0	2.5	35	0	36	9	9	2	8	39.4286	16	2.75	0.621118	13	30	6	5	3.44352	1	0	24245.5	507.772	27075.9	31095.2	16282.9
159	0	0	22	Housewife	4	1	1	1	0	84	89	13.7	41	14.1	42.7	343.82	0	1	1	1		2160	1	.	.	.	.	.	.	0	0	2	6	37.8571	23	3	9.58904	6	35	4.1	3.4	3.44713	0	0	.	.	.	.	.
83	0	0	17	Student	4	1	1	0	0	60	76	13.5	37	13.1	39.9	499	0	0	1	0		2710	1	48	0	2.45	33	0	33	9	9	2	6	39.2857	14	1.91667	10	3	4	4.1	3.4	3.45549	0	0	15731.3	1563.46	21383.5	1044.45	17148.8
196	0	0	38	Other	2	1	2	0	0	63	78	13.7	38.9	.	.	600.3	0	0	1	0		3380	0	48	1	3.06	36	0	37	8	9	2	7	41.7143	6	1.83333	3.43511	7	8	4.1	3.3	3.45906	0	0	6496.68	3330.13	19180	23004.6	16667.7
359	0	0	34	Other	3	1	2	1	0	63	73.5	12.9	39.7	11.2	35.2	822.75	0	0	2	0		4165	0	52	0	2.96	35	0	37	9	9	2	6	39.1429	12	2.75	3.83142	4	5	4.7	3.3	3.46229	0	0	11408.7	5096.8	18629.1	0	13653.1
233	1	3	30	Other	4	2	2	1	0	96	107	11.0333	34.65	11.1	33.2	568.3	0	0	1	0		3320	0	48	0	3	35	0	34	7	9	2	11	40.2857	24	2.83333	6.14035	3	7	5.3	3.7	3.47776	0	0	25751.9	356.959	15140.2	97553.6	15224.5
268	1	2	14	Housewife	3	1	1	1	0	46	54.5	15.6667	27.6	8.5	27.4	758.77	0	0	1	0		2890	0	47	0	2.78	34	0	33	9	9	2	5	35.5714	9	1.91667	.	8	.	4.5	5	3.50043	0	0	13570	2834.6	26157.8	0	14358.6
354	0	0	21	Housewife	4	1	1	1	0	47	65	11.9	34.7	11.6	33.5	752.28	0	0	1	0		2800	1	48	0	2.53	33	0	32	8	9	2	8	40.4286	11	2.66667	14.7826	3	8	2.2	1.2	3.5065	0	0	29157.5	6432.56	23954.3	11446.6	14711.4
95	1	1	29	Student	3	1	2	0	0	66	77	12.7	37.7	11.5	35	486.2	0	0	1	0		3275	0	50	0	2.62	35	0	33	9	10	1	6	38	16	1.91667	5.2356	13	46	3.3	5	3.50852	0	0	16517.2	0	16058.4	78194	12145.7
211	1	1	16	Student	4	1	2	1	1	44	54	12.6	36.2	10.2	30.9	568.66	0	0	1	0		3245	0	51	0	2.45	35	0	34	9	9	2	7	40.5714	13	2.83333	4.5	14	6	3.9	3.8	3.51697	0	0	16320.7	23000.4	8713.29	104488	13011.7
479	0	0	29	Student	4	1	2	0	0	73	92.1	11.7	35.95	11.8	36.9	781.42	0	0	2	0		3985	0	50	0	3.19	36.5	0	37	9	10	2	9	38.8571	14	1.08333	8.88031	1	13	3	2	3.521	0	0	11408.7	6992.73	11100.4	104777	13588.9
277	0	0	22	Housewife	4	1	2	1	0	30	43.6	12.5	38.5	10.1	29.7	522.31	0	0	2	0		2795	0	46	0	2.87	36	0	34	8	9	2	6	37.1429	20	1.91667	9.30233	6	23	4.9	2.8	3.52574	0	0	26275.8	1671.19	17527.4	4222.89	14551.1
458	1	1	23	Housewife	4	2	2	1	1	82	85	12.5	39	11	33.3	608.88	0	0	1	0		3025	0	48	0	2.74	34	0	33	9	10	1	10	37.4286	12	2.83333	7.14286	7	17	4.2	2	3.52694	0	0	5841.74	8306.95	19180	141763	15384.9
18	1	5	15	Student	3	1	2	1	0	54	71	11.7	33.9	11.5	34.3	732.18	0	0	1	0		3840	0	51	0	2.89	37	0	36	8	9	2	10	39.8571	8	2	16.3636	7	15	4.4	2.5	3.534	0	0	44090.1	615.495	15691.1	0	12947.5
138	0	0	18	Student	4	1	1	0	0	47.7	64	12.5	36.6	.	.	678.48	0	0	2	0		3400	0	50	0	2.72	36	0	33	7	9	2	10	40.1429	13	1.91667	3.57143	7	11	.	7	3.53945	0	0	19006	6001.67	24321.5	3645	15256.6
125	1	1	20	Housewife	3	1	1	0	0	47	.	12.65	39.4	12.2	36.7	270.72	0	0	2	1	1	1465	0	40	1	2.29	28	1	26	9	10	1	5	32.7143	19	2	7.03125	10	26	4.1	5.5	3.54412	0	0	7282.61	16278.5	14773	140896	13621
517	0	0	17	Housewife	3	1	1	0	0	47	61	13	39.05	13.7	41.5	519.38	0	0	2	0		3330	0	50	0	2.66	34	0	34	9	10	1	9	40.4286	9	1.91667	8.20896	4	17	4.7	6.5	3.57504	0	0	19791.9	12271.2	10365.9	83973	14230.3
506	1	5	25	Other	4	1	1	1	0	71	89.1	13	40.9	11.2	35.4	669.3	0	0	1	0		4225	0	54	0	2.68	36	0	37	8	9	2	8	41.1429	8	2	10.2564	8	30	4	2.5	3.57775	0	0	16779.2	3761.02	12569.4	82239.3	14486.9
353	0	0	30	Housewife	4	1	1	1	0	57	72	13.1	.	10.4	32.4	644.3	0	0	2	0		3750	0	51	0	2.83	34	0	34	8	9	2	8	38.8571	10	1.83333	4.54545	2	20	5.4	3.4	3.60148	0	0	6431.19	6066.31	12202.2	99287.3	15064.2
373	1	2	17	Housewife	3	1	2	1	0	32	38.5	10.9	34.2	10.4	31.1	375.51	0	0	1	1	1	2150	1	45	1	2.36	30	1	30	9	9	2	12	40.8571	20	2.91667	.	7	.	4	3.1	3.6092	3	2	10229.8	2403.71	12569.4	68658.7	13172
153	0	0	28	Housewife	4	1	2	1	1	48	61	8.9	29.3	.	.	388.5	0	0	1	0		2820	0	48	0	2.55	31	1	32	9	10	1	5	39.2857	15	2.91667	7.61905	1	13	3.4	4.3	3.61123	0	0	17237.7	14382.6	17711	70970.2	14551.1
174	0	0	23	Student	4	1	1	0	0	50	60	11.95	34.5	11.2	33.5	669.75	0	0	1	0		4008	0	51	0	3.02	36	0	34	1	5	1	8	39.8571	11	1.91667	10.4167	8	21	3.2	3	3.61745	0	0	19399	3502.49	29095.8	4222.89	15545.2
234	0	0	26	Housewife	3	1	2	1	0	52	64	11.3	32.5	.	.	650.42	0	0	1	0		3480	0	50	0	2.78	36	0	35	9	10	2	9	38.4286	14	1.91667	4.21941	2	12	3.8	1.7	3.61976	0	0	7544.58	1132.57	30564.8	1622.35	18752.3
207	1	2	18	Housewife	2	2	1	1	0	59	65	.	.	.	.	674.8	0	0	1	0		3515	0	48	1	3.18	34	0	33	9	10	1	9	41	9	1.91667	10.4545	3	23	4.5	3.5	3.6259	0	0	14421.4	2705.33	26157.8	5667.64	14903.8
129	1	1	18	Housewife	3	1	1	1	0	33	48	17.1	51	12	36.3	614.5	0	0	1	0		2525	1	50	0	2.02	34	0	30	8	9	2	8	37.7143	29	2.75	11.0672	6	14	3.9	3.9	3.62897	0	0	.	.	.	.	.
169	0	0	27	Other	4	1	2	0	0	75	94	12.05	36.05	11.1	33.5	549.9	0	0	1	0		2700	1	48	0	2.44	33	0	32	9	10	2	10	40.4286	10	2.83333	21.547	4	17	4.4	4.5	3.63268	0	0	25620.9	7962.24	18261.9	31095.2	18143
184	0	0	18	Housewife	4	1	1	0	0	49	62	11.1	33.6	.	.	646.46	0	0	2	0		3400	0	49	0	2.89	32	1	35	9	10	1	9	40.4286	14	1.83333	7.173	1	12	4.9	2.7	3.6433	0	0	40160.5	2985.41	27626.8	9423.99	16186.7
473	0	0	27	Housewife	2	1	2	1	1	45	54.8	9.1	27.5	10.5	33.3	550.25	0	0	2	0		3400	0	49	0	2.89	33	0	34	8	10	1	6	39.1429	12	0.916667	3.39623	4	7	4.4	1.9	3.64668	0	0	8854.46	15718.3	9080.54	137429	10766.7
221	1	2	22	Student	4	1	1	1	0	64	76	12.1	40.4667	13	39.1	455	0	0	1	0		3135	0	49	0	2.66	35	0	33	8	9	2	10	38	29	2.83333	7.03518	9	19	5	4.3	3.64803	0	0	16451.7	0	15140.2	1911.3	11889.2
456	0	0	23	Other	4	1	1	1	0	65.5	84	11.9333	33.8	11.3	35.1	806.55	0	0	1	0		4030	0	51	0	3.04	37	0	38	9	10	2	7	39.1429	14	1.91667	10.2041	7	16	4.2	1.8	3.64823	0	0	15927.8	98.423	28728.6	0	16796
122	1	3	29	Housewife	2	2	2	1	0	44	53	.	.	11.7	35.9	745.63	0	0	1	0		3655	0	49	0	3.11	34	0	34	9	10	1	7	38.7143	18	2.75	5.5336	8	26	5.3	3.4	3.69047	0	0	6431.19	22720.4	19547.3	71259.2	16282.9
210	1	1	14	Housewife	2	2	1	1	0	51	64	10.2	30.1333	10.5	30.7	523.14	0	0	2	0		3570	0	52	0	2.54	36	0	35	8	9	2	3	39.8571	14	2.75	6.92641	5	34	3.5	1.9	3.70916	0	0	11015.8	11624.8	7244.28	170658	12594.7
54	0	0	25	Housewife	2	1	2	1	1	99	103	.	.	.	.	781.27	0	0	2	0		4050	0	50	0	3.24	34	0	36	8	10	1	8	37.7143	17	2.08333	3.8961	2	18	3.5	7.5	3.73253	0	0	19660.9	11711	16609.2	38896.8	14839.7
171	1	1	31	Housewife	2	1	2	1	1	50	.	14.2	43	15.3	46.5	402.34	0	0	2	0		2750	0	48	0	2.49	32	1	29	9	10	1	3	38.5714	12	2.75	11.8227	17	56	3.5	3	3.73297	0	0	18416.5	4041.1	12569.4	3356.05	12434.4
227	1	5	16	Student	4	1	2	1	1	62	77.3	10.9667	32.4667	10.7	32.9	468.34	0	0	2	0		2930	0	47	1	2.82	36	0	34	8	9	2	6	40.1429	13	1.91667	13.5678	16	11	3.5	3	3.74997	0	0	20905.3	0	31299.4	29072.6	17180.9
206	0	0	29	Other	4	1	2	0	0	76	88	12.6	32.35	13.1	40.6	623.93	0	0	1	0		3125	0	48	0	2.83	36	0	33	7	8	2	5	39.8571	16	3.16667	15.9292	7	10	4.9	6	3.75531	0	0	11212.2	19165.5	17160.1	70392.3	15545.2
361	1	1	30	Housewife	1	1	2	1	0	61	66	12.1	34.9	11.3	34.2	524.55	0	0	1	0		2960	0	48	0	2.68	35	0	33	8	9	2	7	40.1429	16	2	6.2963	5	13	4.3	4	3.77744	0	0	16058.8	7143.54	9080.54	126449	13236.2
222	1	1	19	Housewife	4	2	1	1	0	43	64.4	12	35.75	12.5	37.4	503.4	0	0	2	0		3030	0	48	0	2.74	33	0	33	9	10	1	6	40.1429	23	2	3.73134	7	10	5.3	3.1	3.79808	0	0	26079.3	12874.4	26157.8	57389.6	16379.1
147	0	0	20	Housewife	4	1	1	1	0	65	80	11.7	35	13.5	42.2	489.15	0	0	2	0		3100	0	51	0	2.34	35	0	33	9	10	2	10	41.2857	8	2.91667	5.07812	6	25	5	2.8	3.79958	0	0	26930.7	11301.7	14405.7	79927.7	15481.1
381	0	0	24	Other	4	1	1	1	0	56	70	12.85	38.8	12.4	36.9	508.3	0	0	1	0		2550	0	46	0	2.62	31	0	31	9	9	2	7	35.2857	9	1.83333	3.9823	2	8	4.2	2.4	3.8122	0	0	28437.1	5678.5	32952	18092.5	15064.2
139	1	3	22	Student	3	1	2	1	0	53	61	12.3	35.7	.	.	713.85	0	0	1	0		4220	0	50	0	3.38	34	0	36	8	10	1	4	40.7143	20	1.91667	2.66667	5	13	7.9	2.8	3.82143	0	0	18220.1	3545.57	22301.7	9135.04	17148.8
269	0	0	24	Housewife	4	1	1	1	0	53	65	12.9667	39.1	.	.	435.62	0	0	1	0		2590	1	49	0	2.2	35	0	31	9	10	2	7	39.8571	11	2	15.625	2	16	.	1.8	3.82366	0	0	33152.7	1692.73	17160.1	12891.4	13877.6
240	0	0	36	Housewife	4	1	2	0	0	45	59	12	35	12.1	37.6	407.25	0	0	2	0		2900	0	51	0	2.19	33	0	33	6	9	1	7	41	20	1	4.74138	3	11	6	3.2	3.82974	0	0	21167.3	1628.1	7978.78	168346	14743.5
219	1	1	34	Other	4	1	2	1	0	61	76	12.4	32.65	13.1	39.7	579.66	0	0	1	0		3335	0	51	0	2.51	34	0	34	9	9	2	10	40.7143	19	2	5.62249	5	16	2.9	4.5	3.85969	0	0	54307.1	0	20465.4	42653.2	14679.3
151	0	0	29	Housewife	4	1	1	0	0	69	92	13.6	40.2	11.5	33.9	619.87	0	0	2	0		3560	0	50	0	2.85	35	0	35	8	9	2	12	40.2857	26	1.91667	2.7027	5	4	4	3.2	3.87633	0	0	16124.3	3739.48	16242	43809	13075.8
64	1	4	30	Housewife	2	1	2	1	0	48	59	.	.	12.3	35.4	483.32	0	0	1	0		2660	1	47	1	2.56	34	0	31	8	9	1	4	39	21	3	13.2743	5	33	4.2	5	3.87861	0	0	15731.3	0	22485.3	0	15224.5
355	0	0	20	Housewife	4	1	2	1	0	48	58	12.45	36.95	13.5	40.6	658.9	0	0	1	0		3380	0	51	0	2.55	34	0	35	9	9	2	9	41.2857	13	1.83333	19.9115	3	16	2.8	1.7	3.89543	0	0	23983.5	8931.75	15874.7	57100.7	15417
347	1	3	21	Housewife	4	1	2	0	0	58	65	10.9	32.6	.	.	615.83	0	0	1	0		3430	0	50	0	2.74	35	0	33	8	9	2	6	41.2857	16	1.91667	6.97674	11	28	3.4	2.6	3.89881	0	0	17172.2	6540.29	18812.8	12891.4	12915.4
243	0	0	30	Other	4	1	2	1	0	99	102	12.15	37.15	11	33.6	740.42	0	0	2	0		3750	0	49	0	3.19	35	0	35.5	8	9	2	5	40.1429	16	1.91667	3.125	1	9	4.3	4.6	3.90174	0	0	30663.9	9448.83	17527.4	56233.8	12723
459	0	0	25	Housewife	3	1	2	1	0	53	65	.	.	10.6	33.9	680.25	0	0	2	0		3870	0	50	0	3.1	34	0	37	8	10	1	3	40.8571	14	1.91667	9.65251	1	17	3.3	2.2	3.91578	0	0	30860.4	12745.2	13854.8	134250	13204.1
172	0	0	27	Housewife	4	1	1	0	0	50	63	13.95	41.95	.	.	450.5	0	0	2	1		2470	1	45	1	2.71	33	0	30	7	9	1	10	38.1429	6	1.91667	10.8491	5	10	3.5	5.4	3.92486	0	0	10229.8	3050.05	23954.3	10579.8	18143
35	0	0	23	Housewife	4	1	1	1	0	49	61	11.95	35.35	10.4	32.2	447.7	0	0	2	0		3445	0	49	0	2.93	34	0	33	9	9	2	7	40.4286	15	2.83333	15.7303	6	7	4.2	21.2	3.95024	0	0	.	.	.	.	.
154	1	1	26	Housewife	3	1	2	0	0	66	70	12	39	12.3	38.7	460.94	0	0	2	0		2715	0	48	0	2.45	35	0	33	8	9	2	8	38.8571	7	2.08333	4.03587	9	23	3.8	3.2	3.95519	0	0	31056.8	3222.4	17527.4	5378.69	15737.7
119	1	2	34	Farmer	2	2	2	1	0	63	70	12.6	37.5	12.2	38	601.7	0	0	2	0		3840	0	51	0	2.89	34	0	35	9	10	1	7	40.4286	9	2.75	6.21762	5	15	5.6	4.2	3.96082	0	0	8330.51	5915.49	12202.2	42364.2	14711.4
216	1	3	25	Other	4	1	1	1	0	52	64	10.7	32.85	13.1	40	470.22	0	0	2	0		3060	0	49	0	2.6	34	0	35	8	9	2	9	39.5714	24	1.91667	3.27103	2	7	3.3	3.7	3.97524	0	0	17106.7	4773.62	19730.9	44097.9	14871.8
356	1	4	17	Farmer	3	2	2	1	1	37	58	11.3	33.7	.	.	672.54	0	0	1	0		2825	1	49	0	2.4	34	0	32	9	10	2	7	40.7143	27	3.5	5.68182	10	42	4.4	4.2	3.98642	0	0	17041.2	76.8782	10916.8	128471	16731.9
190	0	0	23	Other	4	1	2	1	0	96	116	12.65	39.75	12.9	40.3	478.95	0	0	2	0		3050	0	50	0	2.44	35	0	34	8	9	2	4	39	18	1.91667	4.01786	4	16	4.4	3.4	3.98797	0	0	25489.9	15653.7	13854.8	107667	16667.7
2	1	2	18	Housewife	3	1	1	1	0	53.5	62	12	35.2	.	.	519.6	0	0	2	0		2925	0	46	0	3.01	32	0	31	9	9	2	0	37.1429	25	1.91667	10.9195	11	12	4.2	1.8	4.01371	0	0	.	.	.	.	.
51	1	1	28	Housewife	3	1	2	1	0	74	84	.	.	13.5	40.5	547.9	0	0	1	0		3060	0	49	0	2.6	34	0	32	9	10	2	6	40.7143	23	2	7.31707	12	26	3	10.9	4.03154	0	0	12391.1	3200.86	11651.3	47854.3	15032.1
218	1	1	15	Housewife	3	1	1	1	0	55	69	12.9	39.1	10.8	32.5	506.7	0	0	1	0		3075	0	47	1	2.96	33	0	32	9	10	1	7	40.1429	19	2.91667	8.03571	15	54	5.7	3.5	4.08072	0	0	16451.7	23668.3	13854.8	226714	19201.3
520	1	1	17	Student	3	1	2	1	1	75	90	12.6	37.5	12.8	38.5	890.4	0	0	2	0		3885	0	50	0	3.11	37	0	38	9	9	2	10	41	23	2.91667	13.0802	8	24	3.5	2.6	4.08693	1	0	8919.95	6798.83	12569.4	146964	13236.2
55	0	0	17	Student	4	1	1	0	0	53	63	11.05	33.55	12.3	37.5	551.35	0	0	2	0		3045	0	50	0	2.44	31	1	32	8	9	1	7	40.2857	17	1.91667	12.0482	3	39	5	4.7	4.12948	0	0	57647.3	3998.01	22118	0	15320.8
367	0	0	27	Other	4	1	1	1	0	53	71	13.3	39.5	13.3	40.8	566.7	0	0	2	0		3010	0	47	0	2.9	34	0	33	9	10	1	4	39	8	2.75	4.83271	7	18	4.8	5.7	4.13453	0	0	59808.6	3050.05	32217.5	0	14198.3
226	0	0	33	Other	4	1	2	0	0	75	85	11.8	35.15	.	.	592.6	0	0	2	0		2900	0	48	0	2.62	34	0	31	9	9	2	7	40.2857	15	1.91667	9.26641	14	8	5.4	5.2	4.18584	0	0	21560.3	9341.1	12936.7	78194	10702.6
45	0	0	24	Housewife	4	1	1	0	0	78	95	12.25	38.45	12.3	38.9	556.4	0	0	2	0		3325	0	49	0	2.83	35	0	33	8	9	2	7	38.8571	15	1.83333	4.84848	5	13	4.8	8.6	4.29152	0	0	11539.7	4450.45	23587	66058.1	15962.2
305	0	0	17	Other	3	1	2	0	0	45	60.2	10.4	32.3	12.1	36.1	580.7	0	0	1	0		3045	0	49	0	2.59	34	0	32	8	9	2	9	38.2857	7	1.91667	6.41509	3	17	4.4	5.3	4.29615	0	0	9640.38	9168.74	10733.2	119514	12947.5
194	0	0	19	Student	4	1	1	0	0	76	91	11.5	34.25	11.8	36.9	426.25	0	0	1	0		3305	0	50	0	2.64	36	0	34	8	9	2	9	40.7143	13	1.83333	5.55556	5	12	3.6	2.4	4.29727	0	0	12915.1	10332.2	8713.29	131072	11664.7
53	1	1	20	Housewife	4	1	1	1	0	59	73	.	.	.	.	833	0	0	2	0		3710	0	51	0	2.8	35	0	36	8	9	2	4	39	26	2.08333	6.50888	16	16	3.4	7.3	4.30986	0	0	.	.	.	.	.
202	0	0	32	Other	3	1	2	1	0	59	67.5	11.8333	34.4333	.	.	536.5	0	0	1	0		2995	0	49	0	2.55	35	0	35	8	9	2	7	37.1429	17	2.83333	1.9802	7	11	3.3	4.3	4.38644	0	0	19202.5	4838.26	17894.6	31384.2	15032.1
165	1	3	22	Other	4	1	2	1	0	78	88	12.35	38.15	12.9	39.9	596.7	0	0	2	0		2830	0	49	0	2.41	33	0	33	9	9	2	5	38.1429	23	2.75	15.9624	17	8	3.4	5.6	4.41851	0	0	20577.8	18217.5	7978.78	128760	14294.5
205	0	0	21	Student	4	1	2	0	0	54	71	10.4	31.65	.	.	657.4	0	0	1	0		3955	0	50	0	3.16	35	0	36	9	9	1	9	40.5714	9	2.08333	0.806452	8	10	4.1	3	4.51902	0	0	27520.2	3545.57	18996.4	37741	15288.7
61	0	0	24	Student	4	1	1	1	0	58	71.5	12.2	35.15	12.3	36.9	591	0	0	1	0		3280	0	48	0	2.97	35	0	33	8	9	2	9	39.1429	18	2.91667	18.0328	4	8	4.4	4.8	4.56419	0	0	.	.	.	.	.
203	0	0	41	Other	4	1	2	1	0	60	82	12.5	37.25	13.4	41	739.3	0	0	1	0		3050	0	49	0	2.59	36	0	33	8	9	2	9	38.1429	3	1.83333	4.23729	2	11	4.9	8	4.61386	0	0	14355.9	9599.64	39562.5	55367	16250.8
59	0	0	25	Housewife	4	1	2	0	0	67	77.8	13.6	40.7	12.9	39.5	539.02	0	0	2	0		3000	0	48	0	2.71	32.5	0	32	8	9	2	9	40	9	1.91667	7.45098	1	6	3.7	3.9	4.83277	0	0	28764.6	3933.38	17343.7	8846.09	14711.4
237	0	0	17	Student	3	1	1	0	0	46	67	12.5	37.4	11.3	35.2	572.11	0	0	1	0		3140	0	51	0	2.37	34	0	33	9	9	2	9	40.4286	14	2.75	12.8	5	23	5.8	4.8	4.92677	0	0	24900.4	3804.11	10549.6	123270	12402.3
419	1	1	24	.	4	1	1	1	0	56		.	.	.	.	.	0	0	2	1	1	2450	0	49	0	2.08	33	0	.	.	.	2	.	37	.	.	.	.	.	.	.	.	.	.	.	.	.	.	.
60	0	0	18	Housewife	3	1	1	0	0	46.2	59	10.8	33.45	.	.	.	0	0	1	0		2880	0	48	0	2.6	34	0	32	7	9	1	5	40.4286	.	.	.	.	.	.	.	.	.	.	.	.	.	.	.
115	0	0	25	Housewife	4	1	1	1	0	60		.	.	.	.	.	0	0	2	0		2780	.	47	.	2.68	34	0	33	8	9	1	10	.	.	.	.	.	.	.	.	.	.	.	.	.	.	.	.
209	0	0	15	Housewife	4	1	1	1	0	47		11.5	34.5	12.7	39.7	.	0	0	1	1		1945	1	45	1	2.13	30	1	29	9	9	2	9	38	.	.	.	.	.	.	.	.	.	.	.	.	.	.	.
408	1	1	16	Housewife	3	2	1	1	0	59	79	11.9	35.6	.	.	.	0	0	1	0		2985	0	49	0	2.54	35	0	34	8	9	2	3	39.4286	.	.	.	.	.	.	.	.	.	.	.	.	.	.	.
420	1	4	20	Housewife	3	1	1	0	0	62		11.3	33.1	.	.	.	0	0	1	0		2850	0	49	0	2.42	32	1	.	.	.	1	.	39	.	.	.	.	.	.	.	.	.	.	.	.	.	.	.
448	1	3	19	Housewife	4	1	1	1	0	55		10.6	32.4	.	.	.	0	0	1	0		3145	0	49	1	2.67	33	1	.	.	.	1	.	42.5714	.	.	.	.	.	.	.	.	.	.	.	.	.	.	.
548	1	4	16	Housewife	3	1	1	0	0	45		11.85	35.15	.	.	.	0	0	1	0		3445	0	49	0	2.93	33	0	.	.	.	1	1	38	.	.	.	.	.	.	.	.	.	.	.	.	.	.	.
561	1	2	18	Housewife	4	1	1	1	0	62		11.55	34.8	.	.	.	0	0	1	0		3300	0	50	0	2.64	35	0	.	.	.	2	3	39	.	.	.	.	.	.	.	.	.	.	.	.	.	.	.
569	1	1	17	Housewife	4	1	1	1	0	67		10.3333	31.4	.	.	.	0	0	2	0		2670	0	48	0	2.41	31	1	.	.	.	1	2	39	.	.	.	.	.	.	.	.	.	.	.	.	.	.	.
592	1	1	27	Other	4	1	1	1	0	68		11	32.9	.	.	.	0	0	1	0		3500	0	53	0	2.35	35	0	.	.	.	1	.	39	.	.	.	.	.	.	.	.	.	.	.	.	.	.	.
285	0	0	23	Other	3	1	1	0	0	80	95.8	11.8333	36.4667	12	36	.	0	0	2	0		3620	0	52	0	2.57	35	0	35	8	9	2	6	41	.	.	.	.	.	.	.	.	.	.	.	.	.	.	.
318	1	1	25	Other	4	1	1	1	0	46		.	.	.	.	.	1	0	.	.	1	.	.	.	.	.	.	.	.	.	.	.	.	14	.	.	.	.	.	.	.	.	.	.	.	.	.	.	.
86	1	1	16	Student	4	1	1	1	0	57		.	.	.	.	.	1	0	.	.	1	.	.	.	.	.	.	.	.	.	.	.	.	.	.	.	.	.	.	.	.	.	.	.	.	.	.	.	.
286	0	0	14	Student	3	1	1	0	0	52	67	9.8	29.5	10.3	31	.	0	0	1	1		2234	0	.	.	.	.	.	.	6	9	1	2	33	.	.	.	.	.	.	.	.	.	.	.	.	.	.	.
441	1	4	18	Student	3	2	1	1	0	60	62	10.3667	31.6667	9.6	29.6	.	0	0	1	1	1	1360	.	39	.	2.29	28.5	.	25	8	9	2	4	30	.	.	.	.	.	.	.	.	.	.	.	.	.	.	.
560	1	2	22	Student	4	1	1	1	0	60		12.8	41.4	.	.	.	0	0	2	0		2830	0	48	0	2.56	32	1	.	.	.	1	8	39	.	.	.	.	.	.	.	.	.	.	.	.	.	.	.
570	1	1	21	Student	4	1	1	1	0	52		10.6	31.1	.	.	.	0	0	2	0		3415	0	50	0	2.73	34	0	.	.	.	1	.	38	.	.	.	.	.	.	.	.	.	.	.	.	.	.	.
579	1	2	18	Student	3	2	1	1	0	45		.	.	.	.	.	0	0	2	0		2915	0	47	0	2.81	33	0	.	.	.	1	.	38	.	.	.	.	.	.	.	.	.	.	.	.	.	.	.
144	0	0	29	Farmer	4	1	2	0	0	72	69.5	14.7	44.8	.	.	.	1	0	.	.		.	.	.	.	.	.	.	.	.	.	.	.	.	.	.	.	.	.	.	.	.	.	.	.	.	.	.	.
87	1	1	16	Housewife	3	1	2	1	0	48		10.9	32.6	.	.	.	0	0	1	0		2630	0	48	0	2.38	35	0	33	7	9	1	6	37	.	.	.	.	.	.	.	.	.	.	.	.	.	.	.
96	1	2	18	Housewife	2	1	2	0	0	52	61	11.8	35.65	.	.	505.58	0	0	2	0		2945	0	45	1	3.23	34	0	35	9	10	2	6	41	32	2.83333	5.11811	11	16	3.7	4.8	.	0	0	33807.6	0	15691.1	7112.39	16379.1
148	0	0	16	Housewife	4	1	2	1	0	61		13.4	41	.	.	.	0	1	1	1		990	.	37	.	1.95	30	.	.	0	0	1	3	29	.	.	.	.	.	.	.	.	.	.	.	.	.	.	.
230	0	0	19	Housewife	2	1	2	0	0	55	68	13.5	40.9	11.5	39.7	.	0	0	1	0		3950	0	49	0	3.36	36	0	38	8	9	2	13	39.8571	.	.	.	.	.	.	.	.	.	.	.	.	.	.	.
250	0	0	19	Housewife	4	1	2	1	0	46		12.7	39.8	.	.	.	0	0	1	0		2585	0	47	0	2.49	34.5	0	.	8	9	2	3	38	.	.	.	.	.	.	.	.	.	.	.	.	.	.	.
323	1	1	16	Housewife	3	1	2	1	0	55		11.3	34.9	.	.	.	1	0	.	.	1	.	.	.	.	.	.	.	.	.	.	.	.	21	.	.	.	.	.	.	.	.	.	.	.	.	.	.	.
431	1	1	15	Housewife	3	1	2	1	0	41		13.4	39.6	.	.	.	0	0	2	0		2600	1	48	0	2.35	32	1	.	.	.	1	.	39	.	.	.	.	.	.	.	.	.	.	.	.	.	.	.
449	1	3	17	Housewife	2	1	2	1	0	49		.	.	.	.	.	0	0	2	0		3630	0	49	0	3.09	35	0	.	.	.	1	.	37	.	.	.	.	.	.	.	.	.	.	.	.	.	.	.
462	0	0	21	Housewife	4	1	2	1	0	51		.	.	.	.	.	0	0	1	0		3495	0	49	0	2.97	34	0	.	.	.	1	.	40	.	.	.	.	.	.	.	.	.	.	.	.	.	.	.
464	0	0	20	Housewife	4	1	2	0	0	53		.	.	.	.	.	0	0	1	0		3430	0	49	0	2.92	35	0	.	.	.	2	.	39	.	.	.	.	.	.	.	.	.	.	.	.	.	.	.
540	1	4	22	Housewife	4	2	2	1	0	49		9.7	29.7	.	.	.	0	0	2	0		3330	0	.	.	.	.	.	.	.	.	2	.	38	.	.	.	.	.	.	.	.	.	.	.	.	.	.	.
558	1	2	26	Housewife	4	1	2	0	0	47		12.4	38.95	.	.	.	0	0	1	0		3295	0	46	1	3.39	33	1	.	.	.	1	.	41	.	.	.	.	.	.	.	.	.	.	.	.	.	.	.
593	1	2	21	Housewife	4	2	2	1	0	53		10.4	30.3	.	.	.	0	0	1	0		3720	0	50	0	2.98	34	0	.	.	.	1	6	42	.	.	.	.	.	.	.	.	.	.	.	.	.	.	.
341	1	1	40	Other	4	1	2	1	0	57		.	.	.	.	.	1	0	.	.	1	.	.	.	.	.	.	.	.	.	.	.	.	10	.	.	.	.	.	.	.	.	.	.	.	.	.	.	.
142	0	0	34	Other	4	1	2	0	0	59	67	14	.	13.1	39.5	.	0	0	2	1		2330	0	40	1	3.64	33	0	29	9	10	2	6	35.4286	.	.	.	.	.	.	.	.	.	.	.	.	.	.	.
509	0	0	22	Other	4	1	2	0	0	75		.	.	.	.	.	0	0	2	0		3055	0	50	0	2.44	33	0	.	.	.	1	.	39	.	.	.	.	.	.	.	.	.	.	.	.	.	.	.
315	1	1	24	Housewife	4	1	2	1	0	57		.	.	.	.	.	1	0	.	.	1	.	.	.	.	.	.	.	.	.	.	.	.	10	.	.	.	.	.	.	.	.	.	.	.	.	.	.	.
550	1	3	20	Housewife	4	2	2	1	1	50		12	36.7	.	.	.	0	0	2	0		2840	0	49	0	2.41	33	0	.	.	.	1	6	40	.	.	.	.	.	.	.	.	.	.	.	.	.	.	.
588	1	1	22	Housewife	3	1	2	1	0	47		9.4	27.3	.	.	.	0	0	2	0		2950	0	.	.	.	.	.	.	.	.	2	.	35	.	.	.	.	.	.	.	.	.	.	.	.	.	.	.
374	0	0	33	Other	4	1	2	1	0	58	70	13.8	39.5	.	.	.	0	0	1	0		3290	0	50	0	2.63	34	0	32	7	9	1	8	39.8571	.	.	.	.	.	.	.	.	.	.	.	.	.	.	.
543	1	1	31	Other	4	1	2	1	0	62		10.6	32	.	.	.	0	0	2	0		3500	0	50	0	2.8	34	0	.	.	.	1	2	39	.	.	.	.	.	.	.	.	.	.	.	.	.	.	.
13	1	1	23	Housewife	4	1	2	1	0	49	63	10.8	31.95	.	.	.	0	0	1	0		3570	0	50	0	2.86	34	0	35	9	10	2	9	40	.	.	.	.	.	.	.	.	.	.	.	.	.	.	.
170	1	1	24	Housewife	3	1	2	0	0	56	59	12.15	37.1	.	.	.	0	0	1	0		3590	0	50	0	2.87	33	0	34	9	10	1	4	40	.	.	.	.	.	.	.	.	.	.	.	.	.	.	.
387	0	0	22	Housewife	3	1	2	1	0	52	61	11.9333	36.9	12.3	39.7	.	0	0	2	0		3045	0	49	0	2.59	33	0	34	8	9	2	8	38.8571	.	.	.	.	.	.	.	.	.	.	.	.	.	.	.
435	1	1	23	Housewife	2	1	2	1	1	52		.	.	.	.	.	0	0	2	0		4200	0	52	0	2.99	35	0	.	.	.	2	8	42	.	.	.	.	.	.	.	.	.	.	.	.	.	.	.
384	1	1	40	Housewife	2	1	2	1	1	43		.	.	.	.	.	0	1	.	.	1	.	.	.	.	.	.	.	.	.	.	.	.	35	.	.	.	.	.	.	.	.	.	.	.	.	.	.	.
575	1	1	43	Other	4	2	2	1	1	74		12.3	36.2	.	.	.	1	0	.	.	1	.	.	.	.	.	.	.	.	.	.	.	.	.	.	.	.	.	.	.	.	.	.	.	.	.	.	.	.
[truncated: 50 more columns]
